# Supplementary material for: Web-based internet searches for digital health products in the United Kingdom before and during the COVID-19 pandemic: a time-series analysis using app libraries from the Organisation for the Review of Care and Health Applications (ORCHA)
Source: PubMed Central journal article supplement — BMJ Open. 2021 Oct 11;11(10):e053891. doi: 10.1136/bmjopen-2021-053891 (PMC8506045; doi:10.1136/bmjopen-2021-053891), 2021-10-11
Supplement: bmjopen-2021-053891.draft_revisions.pdf [file bmjopen-2021-053891.draft_revisions.pdf]

# BMJ Open

BMJ Open is committed to open peer review. As part of this commitment we make the peer review history of every article we publish publicly available.

When an article is published we post the peer reviewers' comments and the authors' responses online. We also post the versions of the paper that were used during peer review. These are the versions that the peer review comments apply to.

The versions of the paper that follow are the versions that were submitted during the peer review process. They are not the versions of record or the final published versions. They should not be cited or distributed as the published version of this manuscript.

BMJ Open is an open access journal and the full, final, typeset and author-corrected version of record of the manuscript is available on our site with no access controls, subscription charges or pay-per-view fees (<http://bmjopen.bmj.com>).

If you have any questions on BMJ Open's open peer review process please email [info.bmjopen@bmj.com](mailto:info.bmjopen@bmj.com)

# BMJ Open

## The changing App-etite for digital health: A time-series analysis pre & post COVID-19

|                               |                                                                                                                                                                                                                                                                                                                                                                                                                                                                                                                                                                                                         |
|-------------------------------|---------------------------------------------------------------------------------------------------------------------------------------------------------------------------------------------------------------------------------------------------------------------------------------------------------------------------------------------------------------------------------------------------------------------------------------------------------------------------------------------------------------------------------------------------------------------------------------------------------|
| Journal:                      | <i>BMJ Open</i>                                                                                                                                                                                                                                                                                                                                                                                                                                                                                                                                                                                         |
| Manuscript ID                 | bmjopen-2021-053891                                                                                                                                                                                                                                                                                                                                                                                                                                                                                                                                                                                     |
| Article Type:                 | Original research                                                                                                                                                                                                                                                                                                                                                                                                                                                                                                                                                                                       |
| Date Submitted by the Author: | 07-Jun-2021                                                                                                                                                                                                                                                                                                                                                                                                                                                                                                                                                                                             |
| Complete List of Authors:     | Leigh, Simon; Organisation for the Review of Care and Health Applications<br>Daly, Rob; The Organisation for the Review of Care and Health Applications<br>Stevens, Sebastian; The Organisation for the Review of Care and Health Applications<br>Lapajne, Luka; The Organisation for the Review of Care and Health Applications<br>Clayton, Charlotte; Bournemouth University, Department of medical sciences and public health<br>Andrews, Tim; The organisation for the review of care and health applications<br>Ashall-Payne, Liz; The organisation for the review of care and health applications |
| Keywords:                     | COVID-19, Telemedicine < BIOTECHNOLOGY & BIOINFORMATICS, PRIMARY CARE                                                                                                                                                                                                                                                                                                                                                                                                                                                                                                                                   |
|                               |                                                                                                                                                                                                                                                                                                                                                                                                                                                                                                                                                                                                         |

SCHOLARONE™  
Manuscripts

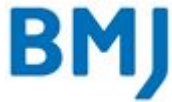

I, the Submitting Author has the right to grant and does grant on behalf of all authors of the Work (as defined in the below author licence), an exclusive licence and/or a non-exclusive licence for contributions from authors who are: i) UK Crown employees; ii) where BMJ has agreed a CC-BY licence shall apply, and/or iii) in accordance with the terms applicable for US Federal Government officers or employees acting as part of their official duties; on a worldwide, perpetual, irrevocable, royalty-free basis to BMJ Publishing Group Ltd ("BMJ") its licensees and where the relevant Journal is co-owned by BMJ to the co-owners of the Journal, to publish the Work in this journal and any other BMJ products and to exploit all rights, as set out in our [licence](#).

The Submitting Author accepts and understands that any supply made under these terms is made by BMJ to the Submitting Author unless you are acting as an employee on behalf of your employer or a postgraduate student of an affiliated institution which is paying any applicable article publishing charge ("APC") for Open Access articles. Where the Submitting Author wishes to make the Work available on an Open Access basis (and intends to pay the relevant APC), the terms of reuse of such Open Access shall be governed by a Creative Commons licence – details of these licences and which [Creative Commons](#) licence will apply to this Work are set out in our licence referred to above.

Other than as permitted in any relevant BMJ Author's Self Archiving Policies, I confirm this Work has not been accepted for publication elsewhere, is not being considered for publication elsewhere and does not duplicate material already published. I confirm all authors consent to publication of this Work and authorise the granting of this licence.

# The changing App-etite for digital health: A time-series analysis pre & post COVID-19

Simon Leigh<sup>1</sup>, Rob Daly<sup>1</sup>, Sebastian Stevens<sup>1</sup>, Luka Lapagne<sup>1</sup>,  
Charlotte Clayton<sup>2</sup>, Tim Andrews<sup>1</sup>, Liz Ashall-Payne<sup>1</sup>

1. The Organisation for the Review of Care and Health Applications (ORCHA). Sci-Tech Daresbury, Vanguard House, Keckwick Lane, Daresbury WA4 4AB
2. Department of medical sciences and public health, Bournemouth University, Bournemouth gateway building, St. Pauls Lane, Bournemouth, Dorset, BH8 8GP

## Corresponding author

Simon Leigh. The Organisation for the Review of Care and Health Applications (ORCHA).  
Sci-Tech Daresbury, Vanguard House, Keckwick Lane, Daresbury WA4 4AB.  
Simon.leigh@orcha.co.uk

## Word count

3,045

## Abstract

### Objectives

To explore if consumer demand for digital health products (DHPs), changed following the COVID-19 pandemic, and the lockdown measures that ensued.

### Design

Retrospective time-series analysis of web-based internet searches for DHPs in the United Kingdom (UK), split over two periods, pre-COVID-19 lockdown (January 2019 to March 23<sup>rd</sup> 2020) and post-COVID-19 lockdown (March 24<sup>th</sup> 2020 to 31<sup>st</sup> December 2020).

### Setting

United Kingdom

### Participants

Members of the UK general population using app libraries provided by the Organisation for the Review of Care and Health Applications.

### Primary and secondary outcome measures

The primary outcome was volume of searches of DHPs during the study period. Secondary outcomes considered search volumes for 25 different therapeutic areas. Outcomes were assessed for significance using a two-stage Poisson test.

## Results

There were 126,640 searches for DHPs over the study period. Searches for DHPs increased by 343% from 2,446 per month prior to COVID-19 lockdown measures being introduced, to 8,996 per month in the period following the first COVID-19 lockdown in the UK. In total 23/25 (92%) of condition areas experienced a significant increase in searches for DHPs, with the greatest increases occurring in the first two-months following lockdown.

Musculoskeletal conditions (2,036%), allergy (1,253%), and healthy living DHPs (1,051%) experienced the greatest increases in searches compared to pre-lockdown. Increased search volumes for DHPs were sustained in the 9-months following the introduction of lockdown measures, with 21/25 (84%) of condition areas experiencing monthly search volumes at least 50% greater than pre-lockdown levels.

## Conclusions

COVID-19, and the restrictions on social and interpersonal interaction that followed, have undoubtedly changed the way people seek medical care. This study has demonstrated a significantly increased demand for DHPs during COVID-19, signifying improved acceptance of this therapeutic medium, and an increased opportunity to provide support, in the event that a third-wave of COVID-19 restrictions are introduced.

## Keywords

Digital health, COVID-19, health-apps

## Strengths & limitations of this study

- This study is a first-of-its-kind in utilising real-world internet search data for DHPs, providing novel insights into the demand for this novel therapeutic medium.
- Segmentation of data into 25 different condition areas has enabled exploration of the appetite for digital health (at the condition level) in previously unexplored ways.
- The collection of data from members of the UK general public, in significant numbers, allows generalisation beyond this study, suggesting that DHPs may be a valuable tool in the event of further COVID lockdown measures.
- A limitation of the study is that searches for DHPs do not always result in downloads and subsequent usage, limiting interpretation in terms of improvements in tangible health outcomes.

## Introduction

The traditional model of healthcare delivery is based on providing medical services through systems of hospitals, primary care facilities and outpatient clinics [1]. However, the COVID-19 pandemic has profoundly disrupted the routine delivery of physical healthcare, resulting in the widespread deferral of elective, preventive, and outpatient appointments by health authorities [2-4]. Estimates suggest that as many as 40% of appointments have been cancelled or postponed by patients, as part of efforts to avoid public spaces as much as possible [5]. In the United States, ambulatory care visits fell by 60% in the early phase of the pandemic [6], while in the United Kingdom (UK) alone, an estimated 1.5million elective admissions and 2.6million outpatient attendances were forgone as a result of

1  
2  
3 COVID-19 [7]. While the details of the longer-term impact of this significant change in  
4  
5 access to services are unclear, short-term cracks are beginning to emerge. Reduced access to  
6  
7 services [8], restrictions on social contact, and concerns regarding future employment  
8  
9 insecurity, have contributed to a significant increase in mental-health sequelae [9].  
10  
11 Additionally, we are yet to observe the full impact that disruptions to cancer services may  
12  
13 have. Cancer Research UK estimated that 2,400 fewer people started treatment for lung  
14  
15 cancer in April to December 2020, compared with the same time in 2019 [10]. Similarly, an  
16  
17 estimated 344, 1,563 and 342 avoidable deaths are expected to occur in the UK as a result  
18  
19 of breast, colorectal and oesophageal cancers respectively, with an estimated 63,229 years  
20  
21 of life lost as a result [11].  
22  
23  
24  
25  
26  
27

28 Given the increasing barriers to both accessing and utilising face-to-face care, the potential  
29  
30 for digital-health to address at least some of the mounting unmet clinical needs, has gained  
31  
32 traction during the pandemic. Digital-health products (DHPs) have been available for many  
33  
34 years now, slowly increasing in popularity across a wide range of health-related  
35  
36 applications in almost all sectors of healthcare [12]. National bodies including the National  
37  
38 Institute for Health and Care Excellence (NICE) are now providing recommendations and  
39  
40 guidelines on both the utilisation and evaluation of DHPs [13,14]. These technologies,  
41  
42 which are widely accessible and fundamentally flexible, continue to provide an additional  
43  
44 means to achieve a continuity of care among those with unmet medical needs [15]. As many  
45  
46 clinicians are now realising the full potential of these digital tools, and becoming more  
47  
48 accepting of DHPs as a potential therapeutic option during the COVID-19 pandemic, it is  
49  
50 uncertain how consumer attitudes and demand for DHPs have changed during this period.  
51  
52  
53  
54  
55  
56  
57  
58  
59  
60



1  
2  
3 Utilising data from the world's largest digital-health evaluation formulary, provided by the  
4  
5 Organisation for the Review of Care and Health Applications (ORCHA) [16]; with over  
6  
7 9,000 DHPs reviewed to date; the aim of this study is to determine how consumer demand  
8  
9 for DHPs for various health conditions has changed since COVID-19 lockdown measures  
10  
11 were introduced in March 2020. We wish to explore whether digital-health is a more  
12  
13 'acceptable' treatment option among members of the public, and ultimately, whether an  
14  
15 appetite for digital-health exists?  
16  
17  
18  
19  
20  
21  
22

## 23 **Materials and Methods**

24  
25  
26 The methodology for this study is a retrospective time-series analysis of real-world  
27  
28 consumer demand for DHPs within ORCHA's Digital Health Libraries, split over two time  
29  
30 periods; before and after the initiation of COVID-19 lockdown procedures in the UK, which  
31  
32 commenced on March 23<sup>rd</sup> 2020. Our aim was to determine if either the volume (absolute  
33  
34 utilisation), or type of DHPs searched for (relative utilisation), changed following the  
35  
36 introduction of COVID-19 lockdown measures, and how demand continued throughout the  
37  
38 pandemic.  
39  
40  
41  
42  
43  
44

### 45 *Health-app search data & categorisation*

46  
47 ORCHA are the world's largest independent reviewer of digital health products (DHPs),  
48  
49 providing a repository of DHPs, evaluated using a ~350 point objective 'yes' or 'no' scale.  
50  
51 These questions take into account a variety of factors including user experience and  
52  
53 usability, clinical assurance and evidence of effectiveness, clinical safety, and data privacy  
54  
55  
56  
57  
58  
59  
60

1  
2  
3 [16]. To date more than 10,000 DHPs have been reviewed and included on ORCHA's 'app-  
4 finder' website. For the purpose of this study, user's digital-health search term data, used  
5 across all ORCHA Digital Health Libraries from 1<sup>st</sup> January 2019 to 31<sup>st</sup> December 2020,  
6 was collected using Google Analytics. We removed 2,486 searches which were exclusively  
7 alpha-numeric, clear typos, or which consisted of just two letters or less. Following this  
8 process there were 126,640 web searches for DHPs within the study period, equal to  
9 approximately 5,276 searches per month. From this group of 126,640 searches, we  
10 identified every unique search term, determining the frequency of use for each over the  
11 study period. In order to explore the different types of DHPs searched for, search terms  
12 were subsequently attributed to one of 25 condition areas. These condition areas were  
13 identified following a multi-disciplinary discussion between three healthcare professionals  
14 (a midwife, a pharmacy specialist lead and an ophthalmologist and a health economist, with  
15 the aim of covering a broad representation of functions and conditions throughout the  
16 human body. We developed an expansive list of search terms attributable to each of the 25  
17 condition areas, using both MESH headings and condition-specific terms (such as insulin in  
18 the case of diabetes, or inhalers for asthma) following methodological guidance for the  
19 purpose of literature reviewing. Each of the four contributors then provided independent  
20 iterative curation of the search terms, creating a quality control chain. In the event that  
21 search terms were missed, they were added and synonyms provided. The search strings used  
22 to tag and classify the unique search terms into each of the 25 condition areas are provided  
23 in Supplementary Figure 1.  
24  
25  
26  
27  
28  
29  
30  
31  
32  
33  
34  
35  
36  
37  
38  
39  
40  
41  
42  
43  
44  
45  
46  
47  
48  
49  
50  
51  
52  
53  
54  
55  
56  
57  
58  
59  
60

1  
2  
3 Remaining terms which had not been initially attributed to one of the 25 condition areas  
4  
5 were then attributed using an iterative two-phase tagging approach. Firstly, we utilised data  
6  
7 from the Digital Health Libraries to identify the names of DHPs associated with each of the  
8  
9 25 condition areas. We used a list of the names of the most commonly searched DHPs for  
10  
11 each condition, which were then also added to the relevant search strings. This was  
12  
13 supplemented by asking a team of several digital-health assessors to provide the names of  
14  
15 any DHPs they could recall for each of the 25 condition areas. While most apps tended to  
16  
17 include the name of the condition within the app name, and therefore would have been  
18  
19 automatically attributed to a condition, this method was particularly useful for apps with  
20  
21 names that did not obviously link to a condition area, such as Wysa® in the case of mental  
22  
23 health, or Xploro® for oncology. Following this process, search terms which had not  
24  
25 already been attributed to a condition area (untagged) were ordered from the most to least  
26  
27 searched (frequency of searches) and reviewed by two independent researchers. Researchers  
28  
29 manually descended the list of terms, and in the event terms were related to one of the 25  
30  
31 condition areas, they were added to the pre-existing search strings. Due to the gamma  
32  
33 distribution of search term frequency (non-negative with a significant positive skew),  
34  
35 reviewers stopped classifying search terms for any term with less than 10 searches over the  
36  
37 two-year period of investigation. This figure was the cut off for classification as it was at  
38  
39 this point that clear typos and alpha-numeric searches which could not clearly be linked to  
40  
41 either condition areas with any certainty, were most common.  
42  
43  
44  
45  
46  
47  
48  
49  
50  
51  
52  
53  
54  
55  
56  
57  
58  
59  
60

### *Statistical analysis*

Given the differential time periods for data collection and analysis (~15 months before lockdown measures were introduced in the United Kingdom on March 23<sup>rd</sup> 2020, and ~9 months after), search frequencies were standardised by determining the mean number of searches per calendar month. The overall change in search frequency (and for apps associated with each of the 25 condition areas), between the two time periods under consideration, was determined by comparing the mean frequency of searches (per month) pre and post-March 23<sup>rd</sup> 2020 (COVID-19 lockdown). A two-sample Poisson test was used to identify if changes in app search frequency, both overall, and by condition area, were statistically significant at the conventional 95% level. All statistical analyses were conducted in Microsoft Office Excel 2013 (Microsoft ®, Redmond, Washington, USA), and Stata 14.

### *Patient & public involvement*

For this retrospective study of real-world DHP search patterns, formal patient and public involvement was not sought.

### *Ethical approval*

Following consultation, ethical approval was not sought as the study falls under market research using secondary data, which was completely anonymous data and with no personal or sensitive information.

## Results

### *Searches for DHPs*

In the period prior to COVID-lockdown measures being introduced (January 1<sup>st</sup> 2019 to March 23<sup>rd</sup> 2020), 36,685 searches for DHPs were undertaken using ORCHA Digital Health Libraries, equivalent to 2,446 per month. As detailed in Table 1, DHPs dedicated to mental health, diabetes, and healthy living were the most frequently searched for during this period. In the period following the introduction of lockdown measures (March 24<sup>th</sup> 2020 onwards), a total of 89,955 searches for DHPs took place, equivalent to 8,996 per month, a 343.4% increase on the previous period ( $p < 0.0001$ ).

### *Searches for DHPs by condition area*

There was substantial variation in changes in DHP search frequency by condition area (pre vs post COVID-19 lockdown), as demonstrated in Table 1. COVID-19, MSK & physiotherapy, allergy, and fitness/diet and weight loss DHPs experienced ~4622%, ~2,036%, ~1,253%, and ~1,051% increases in monthly searches for DHPs following COVID-19 lockdown measures, the largest increases observed. Every condition area, other than carer support and guidance/info experienced a statistically significant increase in searches for DHPs in the period following COVID-19 lockdown measures.

Table 1: Comparison of search frequency pre & post Covid-19 lockdown measures, by condition area.

| Category                          | Searches per month                   | Searches per month                    | Increase (%) | Significance* |
|-----------------------------------|--------------------------------------|---------------------------------------|--------------|---------------|
|                                   | Pre-Lockdown <sup>1</sup><br>(mean=) | Post-Lockdown <sup>2</sup><br>(mean=) |              |               |
| COVID                             | 4                                    | 197                                   | 4622.4%      | p<0.01        |
| MSK + physio                      | 34                                   | 683                                   | 2035.5%      | p<0.01        |
| Allergy                           | 4                                    | 45                                    | 1253.1%      | p<0.01        |
| Fitness, diet & weight loss       | 320                                  | 1663                                  | 1050.8%      | p<0.01        |
| Gastroenterology                  | 12                                   | 92                                    | 767.6%       | p<0.01        |
| Ears & hearing                    | 22                                   | 152                                   | 700.0%       | p<0.01        |
| Kidney                            | 4                                    | 27                                    | 632.3%       | p<0.01        |
| Children's health                 | 34                                   | 211                                   | 613.6%       | p<0.01        |
| Neurological & neurodevelopmental | 119                                  | 698                                   | 588.3%       | p<0.01        |
| Cancer                            | 22                                   | 131                                   | 581.1%       | p<0.01        |
| Women's health                    | 27                                   | 158                                   | 576.5%       | p<0.01        |
| Respiratory                       | 78                                   | 398                                   | 510.4%       | p<0.01        |
| Men's health                      | 4                                    | 18                                    | 487.9%       | p<0.01        |
| Heart                             | 31                                   | 131                                   | 422.9%       | p<0.01        |
| Dental                            | 3                                    | 13                                    | 399.3%       | p<0.01        |
| Pain & chronic fatigue            | 49                                   | 191                                   | 389.6%       | p<0.01        |
| Nose & throat                     | 1                                    | 5                                     | 363.6%       | p<0.01        |
| Mental health                     | 723                                  | 2536                                  | 350.7%       | p<0.01        |
| Pregnancy                         | 48                                   | 161                                   | 338.2%       | p<0.01        |
| Eyes & vision                     | 11                                   | 29                                    | 255.8%       | p<0.01        |
| Diabetes                          | 244                                  | 589                                   | 241.8%       | p<0.01        |
| Addiction                         | 136                                  | 274                                   | 201.4%       | p<0.01        |
| Sleep                             | 259                                  | 474                                   | 183.0%       | p<0.01        |
| Guidance & info                   | 21                                   | 16                                    | 74.3%        | p=0.64        |

|                 |      |      |       |        |
|-----------------|------|------|-------|--------|
| Carer           | 45   | 28   | 63.2% | p=0.14 |
| <b>Combined</b> | 2256 | 8920 | 395%  | N/A    |

<sup>1</sup>Start January 2019 > March 23<sup>rd</sup> 2020 (~15 months)

<sup>2</sup>Start March 24<sup>th</sup> 2020 > End December 2020 (~9 months)

\*Significance determined using two-staged Poisson test

### *Searches for DHPs by condition area, over time*

While the increased frequency of searches for DHPs occurred immediately following the introduction of lockdown proceedings, as demonstrated within Figure 1; the appetite for DHPs in different condition areas was sustained over the 9-month period following COVID-19 lockdown measures. In total 23/25 (92%) of the condition areas analysed experienced monthly search volumes at least 25% greater than pre-lockdown levels, 21/25 (84%) had monthly search volumes at least 50% greater, and 14/25 (56%) experienced search volumes more than 100% greater than pre-lockdown levels.

Figure 1: How demand for digital health changed throughout the Covid-19 pandemic

## **Discussion**

### *Principal findings*

The study provides a first-of-its-kind exploration of the impact of COVID-19, and the ensuing difficulties in accessing face-to-face care, on demand for digital-health products (DHPs) under real-world conditions. Utilising two-years of retrospective data (January 2019 to December 2020) from the world's largest formulary of DHPs, available to members of

1  
2  
3 the public in the United Kingdom, we observed a significant increase in the appetite for  
4 digital health. Searches for DHPs increased by 343% from an average 2,446 per month prior  
5 to COVID-19 lockdown measures being introduced, to an average 8,996 per month in the 9-  
6 month period following the first COVID-19 lockdown. Despite observing a statistically  
7 significant increase in searches for DHPs for all but two of the 25 condition areas listed,  
8 increases in searches varied substantially by condition area, with MSK & physiotherapy  
9 (2,036%), allergy (1,253%), and fitness, diet and weight loss DHPs (1,051%) experiencing  
10 the greatest increases in searches.  
11  
12  
13  
14  
15  
16  
17  
18  
19  
20  
21  
22

### 23 *Strengths and limitations*

24  
25 The strengths of this analysis include the fact that the dataset utilised includes over 125,000  
26 searches for DHPs by members of the public, in the United Kingdom, over a two-year  
27 period. As such, when increases in searches for DHPs were observed post COVID-19  
28 lockdown, the likelihood of this being down to random chance is minimised through the  
29 extensive periods of analysis and the high frequency of search data, both pre and post-  
30 lockdown, under consideration. Additionally, segmentation of search data into different  
31 condition areas allowed exploration of the appetite for digital health in previously  
32 unexplored ways. There are several limitations of this analysis which must also be  
33 considered when interpreting the findings. Firstly, this analysis focused exclusively on  
34 searches for DHPs. While this in itself is not a limitation, and was the subject of the  
35 research question, searches do not always result in downloads and subsequent usage.  
36  
37 Therefore, while we can say with relative certainty that the demand for, or interest in DHPs  
38 increased as a result of COVID-19 lockdown measures, we cannot definitively determine  
39  
40  
41  
42  
43  
44  
45  
46  
47  
48  
49  
50  
51  
52  
53  
54  
55  
56  
57  
58  
59  
60



1  
2  
3 whether this increased interest generated tangible improvements in health as a result.  
4  
5 Secondly, while every attempt was made to ensure that the conditions under consideration  
6  
7 were varied and representative, utilizing an iterative process of healthcare provider and  
8  
9 researcher review; it is possible and also likely, that both important and prevalent conditions  
10  
11 may not have been addressed by the analysis. This may affect the findings by  
12  
13 underestimating (if searches for the DHPs increased significantly) or overestimating (if  
14  
15 searches hardly changed), the impact that COVID-19 had on searches for DHPs. Similarly,  
16  
17 although the process used to identify terms to classify DHPs was thorough and multi-  
18  
19 disciplinary, it is possible that DHPs could have been mis-classified. While it is unlikely  
20  
21 that key terms were omitted, such as diabetes, cancer, mental health or smoking, it is  
22  
23 possible that less obvious app names were missed, where the name of the app has no  
24  
25 obvious medical link to the condition under consideration. This may have led to an  
26  
27 underestimation of searches for condition-specific DHPs in the periods both pre and post  
28  
29 COVID-19 lockdown.  
30  
31  
32  
33  
34  
35  
36

### 37 *Interpretation in light of other evidence*

38  
39 We found that searches for DHPs increased by 343%, a statistically significant increase  
40  
41 from 2,446 per month prior to COVID-19 lockdown measures, to 8,996 per month in the  
42  
43 nine-months following the first COVID-19 lockdown. Although this rise may plausibly be  
44  
45 attributed to a shift in treatment seeking behaviour for those experiencing denied or delayed  
46  
47 access to routine face-to-face appointments with HCPs [17-19], there could be alternative  
48  
49 justifications for this observed increase in searches for DHPs. These include but are not  
50  
51 limited to, the widespread increase in acceptance of DHPs over time [20-22], and promotion  
52  
53  
54  
55  
56  
57  
58  
59  
60

1  
2  
3 of this relatively new therapeutic medium by health authorities. Previous studies, including  
4  
5 two conducted by the authors of this study [23,24] have shown that recommendations from  
6  
7 health authorities to use digital health products, including the NHS and the National  
8  
9 Institute for Health and Care Excellence (NICE), can significantly enhance acceptance and  
10  
11 utilisation. Recently the UK has experienced a substantial increase in regulative clarity, and  
12  
13 with this, recommendations considering potential uses of digital health have increased  
14  
15 significantly; these include the recent release of the NHSX digital technology assessment  
16  
17 criteria (DTAC) [25], and revisions to the NICE evidence standards framework (ESF) [14].  
18  
19 As such, at least some of the increases seen here may have been attributable to latent shifts  
20  
21 in attitudes towards digital health, albeit accelerating them as a result of COVID-19.  
22  
23  
24  
25  
26  
27

28 Another key finding of this study concerned the impact that lockdown measures may have  
29  
30 had, and across different condition areas, as the pandemic progressed. Initially in the United  
31  
32 Kingdom, leisure facilities, organized sports, and the requirement to stay home where  
33  
34 possible, with the exception of one period of exercise a day, led to individuals going out and  
35  
36 taking part in physical activity, whether direct, including organized sports, or indirect,  
37  
38 including walking to work, far less than previous. This indirectly may have made physical  
39  
40 exercise more 'attractive' as an activity, as one of the only permissible reasons to leave  
41  
42 home once a day. Therefore it is to be expected that the need for fitness apps increased, as  
43  
44 observed within this study. In the first three-months following the first period of lockdown,  
45  
46 demand for fitness apps increased by 2000%. As the pandemic progressed, and people  
47  
48 either worked from home more or were furloughed, which for many was a significant  
49  
50 adjustment, the UK also observed a significant surge in alcohol consumption [4], with a  
51  
52  
53  
54  
55  
56  
57  
58  
59  
60

1  
2  
3 corresponding increase in the demand for DHPs centered around addiction, as observed in  
4  
5 this study.  
6  
7  
8

9  
10 *What does this mean for clinical practice?*

11  
12 Whilst it is unlikely that a face-to-face health service will ever be completely replaced by a  
13  
14 virtual experience of any kind, there are clear signs that the healthcare system as we know it  
15  
16 is on the verge of change. As evidenced by the findings of this study, it is clear that people  
17  
18 are increasingly willing to consider digital health when contemplating seeking treatment, for  
19  
20 a variety of health conditions. DHPs offer the ability to gather more accurate timely  
21  
22 information for healthcare appointments, allow advice to be reinforced and new,  
23  
24 convenient, ways to connect with healthcare advice or professionals. Given the potential for  
25  
26 a third wave of COVID-19 restrictions in light of new variants, and increased  
27  
28 transmissibility, it is therefore critical that consumers are directed to safe, trusted and  
29  
30 evidence-based solutions; if the demand for such technologies should arise. This is critical  
31  
32 such that any benefits which may be realized either in the absence of, or in addition to face-  
33  
34 to-face services, are not overshadowed or negated by the potential dangers of using  
35  
36 potentially unsafe and unproven technologies. A large part of this process is informing, and  
37  
38 enabling healthcare professionals to also recognise this opportunity, to become more  
39  
40 actively involved in the provision of high-quality, trusted and safe DHPs, therefore  
41  
42 recommending these products to their patients.  
43  
44  
45  
46  
47  
48  
49  
50  
51  
52  
53  
54  
55  
56  
57  
58  
59  
60

### *Future research*

Future research, which empirically explores attitudes towards digital health and the barriers and facilitators to use among members of the public, is likely to be of significant value for the NHS in realising its long term goals. This study has provided a basis for a hypothesis that the appetite for digital health increased immediately following the introduction of COVID-19 restrictions. These restrictions undoubtedly impacted access to incumbent services and therefore the argument may be made that DHPs were sought as an interim measure in order to fulfill unmet clinical needs. While this is a plausible hypothesis, it does require confirming, while the future role of DHPs beyond the pandemic, as things slowly begin to normalize, also requires exploration, in order to determine if this was a one-time occurrence, or the start of a new era of digital medicine.

### **Conclusion**

The COVID-19 pandemic has profoundly disrupted the routine delivery of healthcare, contributing to unmet clinical needs and significant increases in related sequelae. Digital health has been posed as one solution to address unmet needs resulting from COVID-19, with this time-series analysis exploring real-world demand over the past two-years. Following COVID-19 lockdown measures being introduced, the demand for DHPs increased by 343%, with technologies dedicated to mental health and fitness among those experiencing the greatest increases. This suggests a dramatic shift in treatment seeking behaviour as a result of COVID-19 lockdown measures, signifying increased acceptance of this therapeutic medium, and the increased opportunity to provide support, when access to incumbent services was limited.

## References

1. Senbekov, M, Saliev, T, Bukeyeva, Z, Almabayeva, A, Zhanaliyeva, M, Aitenova, N, Toishibekov, Y, Fakhradiyev, I (2020). The Recent Progress and Applications of Digital Technologies in Healthcare: A Review. *Int J Telemed Appl*, 2020:8830200.
2. Schmid-Küpke, NK, Matysiak-Klose, D, Siedler, A, Felgendreff, L, Wieler, L, Thaiss, HM, Betsch, C (2021). Cancelled routine vaccination appointments due to COVID-19 pandemic in Germany. *Vaccine X*, 8:100094.
3. Spalletta, G, Porcari, DE, Banaj, N, Ciullo, V, Palmer, K (2020). Effects of COVID-19 Infection Control Measures on Appointment Cancellation in an Italian Outpatient Memory Clinic. *Front Psychiatry*, 11:599844.
4. Mansfield, KE, Mathur, R, Tazare, J, Henderson, AD, Mulick, AR, Carreira, H, Matthews, AA, Bidulka, P, Gayle, A, Forbes, H, Cook, S, Wong, AYS, Strongman, H, Wing, K, Warren-Gash, C, Cadogan, SL, Smeeth, L, Hayes, JF, Quint, JK, McKee, M, Langan, SM (2021). Indirect acute effects of the COVID-19 pandemic on physical and mental health in the UK: a population-based study. *Lancet Digit Health*, 3, 4:e217-e230.
5. Shayganfard, M, Mahdavi, F, Haghighi, M, Sadeghi Bahmani, D, Brand, S (2020). Health Anxiety Predicts Postponing or Cancelling Routine Medical Health Care Appointments among Women in Perinatal Stage during the Covid-19 Lockdown. *Int J Environ Res Public Health*, 17, 21:no page given.
6. Mehrotra, A; Chernew, M; Linetsky, D; Hatch, H; Cutler, D; Schneider, EC (2020). The Impact of the COVID-19 Pandemic on Outpatient Care: Visits Return to

- 1  
2  
3 Prepandemic Levels, but Not for All Providers and Patients. The commonwealth  
4  
5 fund.  
6  
7 7. The hidden impact of COVID-19 on patient care in the NHS in England. (2020).  
8  
9 The British Medical Association. Available at:  
10  
11 [https://www.bma.org.uk/media/2841/the-hidden-impact-of-covid\\_web-pdf.pdf](https://www.bma.org.uk/media/2841/the-hidden-impact-of-covid_web-pdf.pdf)  
12  
13  
14 8. The Lancet Infectious Diseases, (2020). The intersection of COVID-19 and mental  
15  
16 health. *Lancet Infect Dis*, 20, 11:1217.  
17  
18 9. Holmes, EA, O'Connor, RC, Perry, VH, Tracey, I, Wessely, S, Arseneault, L,  
19  
20 Ballard, C, Christensen, H, Cohen Silver, R, Everall, I, Ford, T, John, A, Kabir, T,  
21  
22 King, K, Madan, I, Michie, S, Przybylski, AK, Shafran, R, Sweeney, A, Worthman,  
23  
24 King, K, Madan, I, Michie, S, Przybylski, AK, Shafran, R, Sweeney, A, Worthman,  
25  
26 CM, Yardley, L, Cowan, K, Cope, C, Hotopf, M, Bullmore, E (2020).  
27  
28 Multidisciplinary research priorities for the COVID-19 pandemic: a call for action  
29  
30 for mental health science. *Lancet Psychiatry*, 7, 6:547-560.  
31  
32 10. Cancer Research UK. Lung cancer risks becoming 'forgotten disease' of the  
33  
34 coronavirus pandemic. (2020). Available at:  
35  
36 [https://www.cancerresearchuk.org/about-us/cancer-news/news-report/2020-09-17-](https://www.cancerresearchuk.org/about-us/cancer-news/news-report/2020-09-17-lung-cancer-risks-becoming-forgotten-disease-of-the-coronavirus-pandemic)  
37  
38 [lung-cancer-risks-becoming-forgotten-disease-of-the-coronavirus-pandemic](https://www.cancerresearchuk.org/about-us/cancer-news/news-report/2020-09-17-lung-cancer-risks-becoming-forgotten-disease-of-the-coronavirus-pandemic)  
39  
40  
41 11. Maringe, C, Spicer, J, Morris, M, Purushotham, A, Nolte, E, Sullivan, R, Rachet, B,  
42  
43 Aggarwal, A (2020). The impact of the COVID-19 pandemic on cancer deaths due  
44  
45 to delays in diagnosis in England, UK: a national, population-based, modelling  
46  
47 study. *Lancet Oncol*, 21, 8:1023-1034.  
48  
49  
50 12. Gordon, WJ, Landman, A, Zhang, H, Bates, DW (2020). Beyond validation: getting  
51  
52 health apps into clinical practice. *NPJ Digit Med*, 3:14.  
53  
54  
55  
56  
57  
58  
59  
60



- 1  
2  
3 Perspectives of patients and healthcare professionals on mHealth for asthma self-  
4  
5 management. *Eur Respir J*, 49, 5:no page given.  
6  
7 21. Kong, T, Scott, MM, Li, Y, Wichelman, C (2020). Physician attitudes towards-and  
8  
9 adoption of-mobile health. *Digit Health*, 6:2055207620907187.  
10  
11 22. Rowland, SP, Fitzgerald, JE, Holme, T, Powell, J, McGregor, A (2020). What is the  
12  
13 clinical value of mHealth for patients?. *NPJ Digit Med*, 3:4.  
14  
15 23. Leigh, S, Ashall-Payne, L, Andrews, T (2020). Barriers and Facilitators to the  
16  
17 Adoption of Mobile Health Among Health Care Professionals From the United  
18  
19 Kingdom: Discrete Choice Experiment. *JMIR Mhealth Uhealth*, 8, 7:e17704.  
20  
21 24. Leigh, S, Ashall-Payne, L (2019). The role of health-care providers in mHealth  
22  
23 adoption. *Lancet Digit Health*, 1, 2:e58-e59.  
24  
25 25. NHSX. Digital Technology Assessment Criteria (DTAC).  
26  
27 [https://www.nhsx.nhs.uk/key-tools-and-info/digital-technology-assessment-criteria-](https://www.nhsx.nhs.uk/key-tools-and-info/digital-technology-assessment-criteria-dtac/)  
28  
29 [dtac/](https://www.nhsx.nhs.uk/key-tools-and-info/digital-technology-assessment-criteria-dtac/)  
30  
31  
32  
33  
34  
35  
36  
37  
38

## 39 Ethical approval

40  
41 Following consultation, ethical approval was not sought as the study falls under market  
42  
43 research using secondary data, which was completely anonymous data and with no personal  
44  
45 or sensitive information.  
46  
47  
48  
49

## 50 Availability of data and materials

51  
52 The data that support the findings of this study can be made available upon request  
53  
54  
55  
56  
57  
58  
59  
60



## Conflicts of interest

The authors declare that they have no conflicts of interest.

## Funding

The study was funded by the Organisation for the Review of Care and Health Applications (ORCHA).

## Author statement

SL, TA and LAP devised the study. RD led the data collection. LL and CC provided curation of the data. RD, SL & SS planned and conducted the statistical analysis. SL, SS, RD, LL and CC drafted the manuscript. All authors read and approved the final manuscript.

## Acknowledgments

None

1  
2  
3  
4  
5  
6  
7  
8  
9  
10  
11  
12  
13  
14  
15  
16  
17  
18  
19  
20  
21  
22  
23  
24  
25  
26  
27  
28  
29  
30  
31  
32  
33  
34  
35  
36  
37  
38  
39  
40  
41  
42  
43  
44  
45  
46  
47  
48  
49  
50  
51  
52  
53  
54  
55  
56  
57  
58  
59  
60

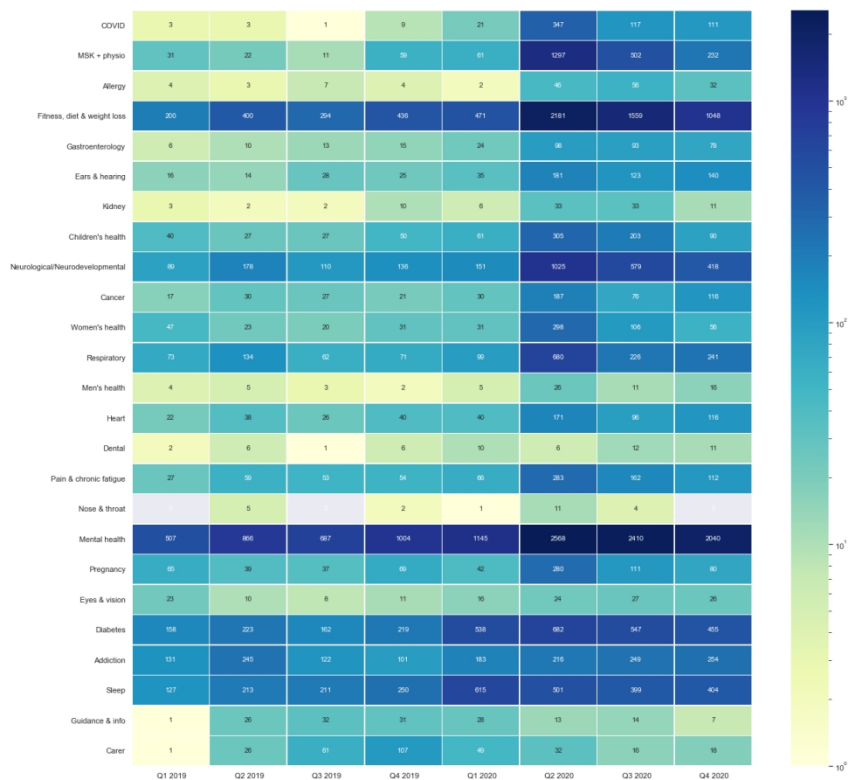

How demand for digital health changed throughout the Covid-19 pandemic

## Technical Appendix – Search terms used to identify condition-specific searches for DHTs

### Addiction

abstinen\*, addict\*, alcohol\*, booze, cessation, cig\*, cigarette, drink\*, kwit, my quit route, nicotin\*, quit, quit genius, smok\*, tobacc\*, units

### Allergy

allerg\*, hay fever, hayfever, intoleran\*, itch\*, rash, sneez, wheez

### Carer

Carer

### Cancer

blastoma, cancer\*, carcinoma, chemo\*, leukaem\*, leukem\*, lymphom\*, malig\*, melanom\*, mole, my dignio, mydignio, myeloma, oncology, owise, radiotherapy, skinvision, tumor, tumour, untire, vinehealth

### Children's health

apart of me, baby, brush DJ, catch app, child\*, glue ear, handi, huckleberry, infant\*, kids, kooth, little journey, moshi, mycognition ED, neonat\*, paed\*, pediatric, teen\*, thinkninja, toddl\*, worrinots, xploro

### COVID

covid, corona, n-Cov\*

**Dental**

braces, brush\*, calculus, cavities, cavity, decay, dental, dentist, denture, enamel, gingivitis, incisor, jaw, mandib\*, maxilla, molar,,al health,,al hygiene,,thodont\*, palate, periodontal, periodontitis, plaque, root canal, teeth, tooth, veneer

**Diabetes search terms**

blood sugar, blood glucose, diab\*, freestyle, glycaemi\*, glyce\*mi\*, hba1c, hedia, hypergly\*, hypogly\*, insulin, intellin, libre, my desmond, onetouch, oviva, retina risk, SMBG, sugar, sugr, t1d, t1dm, t2d, t2dm, type1, type-1, type2, type-2

**Diet & weight loss search terms**

activ\*, bmi, body mass index, calorie\*, celiac, coeliac, couch, Diet\*, eat\*, fasting, fit bit, fitbit, food\*, gluten, gojauntly, healthy living, lincus, liva, meal\*, mutu, myfitnesspal, nike, noom, nutrition\*, obes\*, one you, oneyou, overweight, protein, recipe\*, second nature, span health, vegan, weigh\*

**Ears & hearing**

Deaf\*, ear, hear\*, meniere, tinnitus, vertigo,

**Eyes & vision**

amblyopia, cataract, eye\*, glaucoma, macular, myopia, ophthal\*, optom\*, presbyopia, retina\*, retino\*, vision, visual

**Fitness search terms**

Activ\*, cardio, exer\*, fit\*, garmin, gym, komoot, madbarz, moves4me, peloton, pilates, push up, run, strava, stretch\*, walking, work out, yoga

## Gastroenterology

bloat\*, bowel, colitis, constip\*, crohn\*, diarrh\*, digest\*, FODMAP, gall stone, gallstone,  
gastroenterol\*, gastrointestinal, gut, hemorrhoid\*, haemorrhoid\*, heart burn, heartburn, IBD, IBS,  
indigest\*, intestin\*, reflux, stomach, zemediy

## Heart

angina, arrhythmia, atrial, beats per, blood pressure, BP, bpm, cardiac, cardiology, cardiovascular,  
chest pain, cholesterol, coronary, ECG, fibrilcheck, fibril\*, heart, hyperlipid\*, hypertens\*, pacemaker,  
pulse

## Info & guidance

guidance, info\*

## Kidney disease

Acr, kidney ,renal, urinalysis,

## Men's health

Erect\*, man\*, men\*, penis, penil\*, prostate, testic\*, testis,

## Mental health search terms

7 cups, anger, anx\*, big white wall, bipolar, blues, calm, catch, CBT, chill panda, clear fear,  
cognitive, cognitive behavioral, cognitive behavioural, combined minds, counselling, cove, daylight,  
depress\*, distract, drjulian, equoo, esteem, fear, feeling good, grief, happi\*, happy\*, head space, ieso,  
kooth, loneliness, lonely, mania, meditat\*, mee two, Ment\*, mind, mindful, mindset, mind shift,  
mood, moshi, my therapy, obsessive, obsessive-compulsive, obsessive compulsive , OCD, pacifica,  
panic, personality disorder, phobia, psychiat\*, psycho\*, PTSD, relax, schizophrenia, sidekick, silver  
cloud, stay alive, stress\*, suicid\*, think ninja, thrive, trauma, woebot, worry, wysa, youper

**Musculoskeletal search terms**

ankle, arthrit\*, back, bone, chiroprac, elbow, gout, hip, joint\*, knee, MSK, Musculo\*, osteo\*,  
physiapp, physio\*, physitrack, rehab\*, rheu\*, shoulder\*, viatherapy, wrist

**Neurological**

ADHD, alzheimer\*, aphasia, attention deficit, autis\*, brain\*, cerebral, cerebro, cognition, CVA, CVE,  
demen\*, dyslexia, dysphagia, elevate, epilep\*, grey matter, head ache, headache, learning difficulty,  
learning disability, lumosity, m.s, memor, migraine, MS, multiple sclerosis, neuro\*, paraesthesia,  
parkinson\*, speech, stammer, stroke, swallow

**Nose & throat**

Dysphonia, laryn\*, nasal, nose, pharyn\*, strep\*, throat, tonsil\*, vocal,

**Pain**

ache, CRPS, Fatigue, Fibromyalgia, hurt\*, myalgia, ouchie, pain\*, sciatica, sore\*

**Pregnancy**

abortion, antenatal, baby, breast start, breastfeed\*, conceiv\*, concep\*, conciev\*, eclamp\*, fertil\*,  
intrapartum, IVF, lactapp, matern\*, miscarr\*, mum, mush, natural cycles, neonatal, perinatal,  
postnatal, postpartum, pre eclamp\*, pre-eclamp, preeclamp\*, preg\*, reprod\*

**Respiratory search terms**

air way, airway, asth\*, breath\*, bronch\*, COPD, cough\*, cystic fibrosis, dyspnoea, elfy, hailie,  
inhaler, lung\*, nuvoair, peak flow, pneum\*, pulmonary, rafi tone, respiratory, triumf, zephyr guide

**Self-harm**

Distract, harm, self harm, self-harm, stay alive, suicide\*

**Sleep search terms**

feeling good, headspace, insom\*, moshi, nightmare, night terror, pzizz, Sleep\*, snor\*

**Women's health**

breast\*, cervical, cervix, continence, contracept\*, ferly, flo, flow, gynae\*, gyne\*, hot flashes,  
incontinen\*, libido, menopaus\*, menstrua\*, mutu, natural cycles, night sweats, obstetri\*, ovarian,  
ovary, ovul\*, painful intercourse, painful sex, PCOS, pelvic, period, sexual health, squeezy, woman,  
women

For peer review only

STROBE Statement—Checklist of items that should be included in reports of *cohort studies*

|                              | Item No | Recommendation                                                                                                                                                                                                                                                                                                         | Page No                                                                                      |
|------------------------------|---------|------------------------------------------------------------------------------------------------------------------------------------------------------------------------------------------------------------------------------------------------------------------------------------------------------------------------|----------------------------------------------------------------------------------------------|
| <b>Title and abstract</b>    | 1       | (a) Indicate the study's design with a commonly used term in the title or the abstract<br>(b) Provide in the abstract an informative and balanced summary of what was done and what was found                                                                                                                          | 1 & 2                                                                                        |
| <b>Introduction</b>          |         |                                                                                                                                                                                                                                                                                                                        |                                                                                              |
| Background/rationale         | 2       | Explain the scientific background and rationale for the investigation being reported                                                                                                                                                                                                                                   | 4 & 5                                                                                        |
| Objectives                   | 3       | State specific objectives, including any prespecified hypotheses                                                                                                                                                                                                                                                       | 5                                                                                            |
| <b>Methods</b>               |         |                                                                                                                                                                                                                                                                                                                        |                                                                                              |
| Study design                 | 4       | Present key elements of study design early in the paper                                                                                                                                                                                                                                                                | 6                                                                                            |
| Setting                      | 5       | Describe the setting, locations, and relevant dates, including periods of recruitment, exposure, follow-up, and data collection                                                                                                                                                                                        | 7                                                                                            |
| Participants                 | 6       | (a) Give the eligibility criteria, and the sources and methods of selection of participants. Describe methods of follow-up<br>(b) For matched studies, give matching criteria and number of exposed and unexposed                                                                                                      | 7                                                                                            |
| Variables                    | 7       | Clearly define all outcomes, exposures, predictors, potential confounders, and effect modifiers. Give diagnostic criteria, if applicable                                                                                                                                                                               | 8 & 9                                                                                        |
| Data sources/<br>measurement | 8*      | For each variable of interest, give sources of data and details of methods of assessment (measurement). Describe comparability of assessment methods if there is more than one group                                                                                                                                   | 7 & 8                                                                                        |
| Bias                         | 9       | Describe any efforts to address potential sources of bias                                                                                                                                                                                                                                                              | 7 & 8                                                                                        |
| Study size                   | 10      | Explain how the study size was arrived at                                                                                                                                                                                                                                                                              | 7                                                                                            |
| Quantitative variables       | 11      | Explain how quantitative variables were handled in the analyses. If applicable, describe which groupings were chosen and why                                                                                                                                                                                           | 8                                                                                            |
| Statistical methods          | 12      | (a) Describe all statistical methods, including those used to control for confounding<br>(b) Describe any methods used to examine subgroups and interactions<br>(c) Explain how missing data were addressed<br>(d) If applicable, explain how loss to follow-up was addressed<br>(e) Describe any sensitivity analyses | 8                                                                                            |
| <b>Results</b>               |         |                                                                                                                                                                                                                                                                                                                        |                                                                                              |
| Participants                 | 13*     | (a) Report numbers of individuals at each stage of study—eg numbers potentially eligible, examined for eligibility, confirmed eligible, included in the study, completing follow-up, and analysed<br>(b) Give reasons for non-participation at each stage<br>(c) Consider use of a flow diagram                        | 10                                                                                           |
| Descriptive data             | 14*     | (a) Give characteristics of study participants (eg demographic, clinical, social) and information on exposures and potential confounders                                                                                                                                                                               | N/A (time-series analysis). In absence of time-series checklist, a cohort study was the next |



1  
2  
3  
4  
5  
6  
7  
8  
9  
10  
11  
12  
13  
14  
15  
16  
17  
18  
19  
20  
21  
22  
23  
24  
25  
26  
27  
28  
29  
30  
31  
32  
33  
34  
35  
36  
37  
38  
39  
40  
41  
42  
43  
44  
45  
46  
47  
48  
49  
50  
51  
52  
53  
54  
55  
56  
57  
58  
59  
60

|              |     |                                                                                     |                   |
|--------------|-----|-------------------------------------------------------------------------------------|-------------------|
|              |     | (b) Indicate number of participants with missing data for each variable of interest | best alternative. |
|              |     | (c) Summarise follow-up time (eg, average and total amount)                         |                   |
| Outcome data | 15* | Report numbers of outcome events or summary measures over time                      | 10 & 11           |

For peer review only

|    |                          |    |                                                                                                                                                                                                              |         |
|----|--------------------------|----|--------------------------------------------------------------------------------------------------------------------------------------------------------------------------------------------------------------|---------|
| 1  | Main results             | 16 | (a) Give unadjusted estimates and, if applicable, confounder-adjusted estimates and their precision (eg, 95% confidence interval). Make clear which confounders were adjusted for and why they were included | 10 & 11 |
| 2  |                          |    | (b) Report category boundaries when continuous variables were categorized                                                                                                                                    |         |
| 3  |                          |    | (c) If relevant, consider translating estimates of relative risk into absolute risk for a meaningful time period                                                                                             |         |
| 4  |                          |    |                                                                                                                                                                                                              |         |
| 5  |                          |    |                                                                                                                                                                                                              |         |
| 6  |                          |    |                                                                                                                                                                                                              |         |
| 7  |                          |    |                                                                                                                                                                                                              |         |
| 8  |                          |    |                                                                                                                                                                                                              |         |
| 9  | Other analyses           | 17 | Report other analyses done—eg analyses of subgroups and interactions, and sensitivity analyses                                                                                                               | 10 & 11 |
| 10 |                          |    |                                                                                                                                                                                                              |         |
| 11 | <b>Discussion</b>        |    |                                                                                                                                                                                                              |         |
| 12 |                          |    |                                                                                                                                                                                                              |         |
| 13 | Key results              | 18 | Summarise key results with reference to study objectives                                                                                                                                                     | 11      |
| 14 | Limitations              | 19 | Discuss limitations of the study, taking into account sources of potential bias or imprecision. Discuss both direction and magnitude of any potential bias                                                   | 12 & 13 |
| 15 |                          |    |                                                                                                                                                                                                              |         |
| 16 | Interpretation           | 20 | Give a cautious overall interpretation of results considering objectives, limitations, multiplicity of analyses, results from similar studies, and other relevant evidence                                   | 13-15   |
| 17 |                          |    |                                                                                                                                                                                                              |         |
| 18 |                          |    |                                                                                                                                                                                                              |         |
| 19 | Generalisability         | 21 | Discuss the generalisability (external validity) of the study results                                                                                                                                        | 12 & 13 |
| 20 |                          |    |                                                                                                                                                                                                              |         |
| 21 | <b>Other information</b> |    |                                                                                                                                                                                                              |         |
| 22 |                          |    |                                                                                                                                                                                                              |         |
| 23 | Funding                  | 22 | Give the source of funding and the role of the funders for the present study and, if applicable, for the original study on which the present article is based                                                | 21      |
| 24 |                          |    |                                                                                                                                                                                                              |         |

\*Give information separately for exposed and unexposed groups.

**Note:** An Explanation and Elaboration article discusses each checklist item and gives methodological background and published examples of transparent reporting. The STROBE checklist is best used in conjunction with this article (freely available on the Web sites of PLoS Medicine at <http://www.plosmedicine.org/>, Annals of Internal Medicine at <http://www.annals.org/>, and Epidemiology at <http://www.epidem.com/>). Information on the STROBE Initiative is available at <http://www.strobe-statement.org>.

# BMJ Open

**Web-based internet searches for digital health products in the United Kingdom before and during the COVID-19 pandemic: a time-series analysis using app libraries from the Organisation for the Review of Care and Health Applications (ORCHA)**

|                                 |                                                                                                                                                                                                                                                                                                                                                                                                                                                                                                                                                                                                         |
|---------------------------------|---------------------------------------------------------------------------------------------------------------------------------------------------------------------------------------------------------------------------------------------------------------------------------------------------------------------------------------------------------------------------------------------------------------------------------------------------------------------------------------------------------------------------------------------------------------------------------------------------------|
| Journal:                        | <i>BMJ Open</i>                                                                                                                                                                                                                                                                                                                                                                                                                                                                                                                                                                                         |
| Manuscript ID                   | bmjopen-2021-053891.R1                                                                                                                                                                                                                                                                                                                                                                                                                                                                                                                                                                                  |
| Article Type:                   | Original research                                                                                                                                                                                                                                                                                                                                                                                                                                                                                                                                                                                       |
| Date Submitted by the Author:   | 21-Sep-2021                                                                                                                                                                                                                                                                                                                                                                                                                                                                                                                                                                                             |
| Complete List of Authors:       | Leigh, Simon; Organisation for the Review of Care and Health Applications<br>Daly, Rob; The Organisation for the Review of Care and Health Applications<br>Stevens, Sebastian; The Organisation for the Review of Care and Health Applications<br>Lapajne, Luka; The Organisation for the Review of Care and Health Applications<br>Clayton, Charlotte; Bournemouth University, Department of medical sciences and public health<br>Andrews, Tim; The organisation for the review of care and health applications<br>Ashall-Payne, Liz; The organisation for the review of care and health applications |
| <b>Primary Subject Heading</b>: | Public health                                                                                                                                                                                                                                                                                                                                                                                                                                                                                                                                                                                           |
| Secondary Subject Heading:      | Complementary medicine, Health services research                                                                                                                                                                                                                                                                                                                                                                                                                                                                                                                                                        |
| Keywords:                       | COVID-19, Telemedicine < BIOTECHNOLOGY & BIOINFORMATICS, PRIMARY CARE                                                                                                                                                                                                                                                                                                                                                                                                                                                                                                                                   |
|                                 |                                                                                                                                                                                                                                                                                                                                                                                                                                                                                                                                                                                                         |

SCHOLARONE™  
Manuscripts



I, the Submitting Author has the right to grant and does grant on behalf of all authors of the Work (as defined in the below author licence), an exclusive licence and/or a non-exclusive licence for contributions from authors who are: i) UK Crown employees; ii) where BMJ has agreed a CC-BY licence shall apply, and/or iii) in accordance with the terms applicable for US Federal Government officers or employees acting as part of their official duties; on a worldwide, perpetual, irrevocable, royalty-free basis to BMJ Publishing Group Ltd ("BMJ") its licensees and where the relevant Journal is co-owned by BMJ to the co-owners of the Journal, to publish the Work in this journal and any other BMJ products and to exploit all rights, as set out in our [licence](#).

The Submitting Author accepts and understands that any supply made under these terms is made by BMJ to the Submitting Author unless you are acting as an employee on behalf of your employer or a postgraduate student of an affiliated institution which is paying any applicable article publishing charge ("APC") for Open Access articles. Where the Submitting Author wishes to make the Work available on an Open Access basis (and intends to pay the relevant APC), the terms of reuse of such Open Access shall be governed by a Creative Commons licence – details of these licences and which [Creative Commons](#) licence will apply to this Work are set out in our licence referred to above.

Other than as permitted in any relevant BMJ Author's Self Archiving Policies, I confirm this Work has not been accepted for publication elsewhere, is not being considered for publication elsewhere and does not duplicate material already published. I confirm all authors consent to publication of this Work and authorise the granting of this licence.

1  
2  
3  
4  
5  
6  
7  
8  
9  
10  
11  
12  
13  
14  
15

# Web-based internet searches for digital health products in the United Kingdom before and during the COVID-19 pandemic: a time-series analysis using app libraries from the Organisation for the Review of Care and Health Applications (ORCHA)

16  
17  
18  
19  
20  
21  
22

Simon Leigh<sup>1</sup>, Rob Daly<sup>1</sup>, Sebastian Stevens<sup>1</sup>, Luka Lapajne<sup>1</sup>,  
Charlotte Clayton<sup>2</sup>, Tim Andrews<sup>1</sup>, Liz Ashall-Payne<sup>1</sup>

- 23  
24  
25  
26  
27  
28  
29  
30
1. The Organisation for the Review of Care and Health Applications (ORCHA). Sci-Tech Daresbury, Vanguard House, Keckwick Lane, Daresbury WA4 4AB
  2. Department of medical sciences and public health, Bournemouth University, Bournemouth gateway building, St. Pauls Lane, Bournemouth, Dorset, BH8 8GP

31  
32  
33

## Corresponding author

34  
35  
36  
37  
38  
39  
40

Simon Leigh. The Organisation for the Review of Care and Health Applications (ORCHA).  
Sci-Tech Daresbury, Vanguard House, Keckwick Lane, Daresbury WA4 4AB.  
Simon.leigh@orcha.co.uk

41  
42  
43

## Word count

44  
45

3,045

46  
47  
48  
49

## Abstract

50  
51

### Objectives

52  
53  
54  
55  
56  
57  
58  
59  
60

To explore if consumer interest in digital health products (DHPs), changed following the COVID-19 pandemic and the lockdown measures that ensued.

## Design

Retrospective time-series analysis of web-based internet searches for DHPs in the United Kingdom (UK), split over two periods, pre-COVID-19 lockdown (January 2019 to March 23<sup>rd</sup> 2020) and post-COVID-19 lockdown (March 24<sup>th</sup> 2020 to 31<sup>st</sup> December 2020).

## Setting

UK

## Participants

Members of the UK general population using health-app libraries provided by the Organisation for the Review of Care and Health Applications (ORCHA).

## Primary and secondary outcome measures

The primary outcome was volume of searches for DHPs. Secondary outcomes considered search volumes for 25 different therapeutic areas. Outcomes were assessed for significance using a two-stage Poisson test.

## Results

There were 126,640 searches for DHPs over the study period. Searches for DHPs increased 343% from 2,446 per month prior to COVID-19 lockdown measures being introduced, to 8,996 per month in the period following the first COVID-19 lockdown in the UK. In total 23/25 (92%) of condition areas experienced a significant increase in searches for DHPs,

1  
2  
3 with the greatest increases occurring in the first two-months following lockdown.  
4  
5 Musculoskeletal conditions (2,036%), allergy (1,253%), and healthy living DHPs(1,051%)  
6  
7 experienced the greatest increases in searches compared to pre-lockdown. Increased search  
8  
9 volumes for DHPs were sustained in the 9-months following the introduction of lockdown  
10  
11 measures, with 21/25 (84%) of condition areas experiencing monthly search volumes at  
12  
13 least 50% greater than pre-lockdown levels.  
14  
15  
16  
17

## 18 **Conclusions**

19  
20 The COVID-19 pandemic has profoundly disrupted the routine delivery of healthcare,  
21  
22 making face-to-face interaction difficult, and contributing to unmet clinical needs. This  
23  
24 study has demonstrated significant increases in internet searches for DHPs by members of  
25  
26 the UK population since COVID-19, signifying an increased interest in this potential  
27  
28 therapeutic medium. Future research should clarify whether this increased interest has  
29  
30 resulted in increased acceptance and utilisation of these technologies also.  
31  
32  
33  
34  
35  
36

## 37 **Keywords**

38  
39 Digital health, COVID-19, health-apps  
40  
41  
42  
43  
44  
45  
46  
47

## 48 **Strengths & limitations of this study**

- 49  
50 • This study is a first-of-its-kind in utilising real-world internet search data for DHPs,  
51  
52 providing novel insights into consumer interest in this novel therapeutic medium.  
53  
54  
55  
56  
57  
58  
59  
60

- Segmentation of data into 25 different condition areas has enabled exploration of the interest in digital health (at the condition level) in previously unexplored ways.
- The collection of data from members of the UK general public, in significant numbers, allows generalisation beyond this study, suggesting that DHPs may be a valuable tool in the event of further COVID lockdown measures.
- A limitation of the study is that searches for DHPs do not always result in downloads and subsequent usage, limiting interpretation in terms of what we believe the observed increase in internet searches for DHPs means in terms of improvements in tangible health outcomes.

## Introduction

The traditional model of healthcare delivery is based on providing medical services through systems of hospitals, primary care facilities and outpatient clinics [1]. However, the COVID-19 pandemic has profoundly disrupted the routine delivery of physical healthcare, resulting in the widespread deferral of elective, preventive, and outpatient appointments by health authorities [2-4]. Estimates suggest that as many as 40% of appointments have been cancelled or postponed by patients, as part of efforts to avoid public spaces as much as possible [5]. In the United States, ambulatory care visits fell by 60% in the early phase of the pandemic [6], while in the United Kingdom (UK) alone, an estimated 1.5million elective admissions and 2.6million outpatient attendances were forgone as a result of COVID-19 [7]. While the details of the longer-term impact of this significant change in access to services are unclear, short-term cracks are beginning to emerge. Reduced access to services [8], restrictions on social contact, and concerns regarding future employment



1  
2  
3 insecurity, have contributed to a significant increase in mental-health sequelae [9].

4  
5 Additionally, we are yet to observe the full impact that disruptions to cancer services may  
6  
7 have. Cancer Research UK estimated that 2,400 fewer people started treatment for lung  
8  
9 cancer in April to December 2020, compared with the same time in 2019 [10]. Similarly, an  
10  
11 estimated 344, 1,563 and 342 avoidable deaths are expected to occur in the UK as a result  
12  
13 of breast, colorectal and oesophageal cancers respectively, with an estimated 63,229 years  
14  
15 of life lost as a result [11].  
16  
17

18  
19  
20  
21 Given the increasing barriers to both accessing and utilising a variety of face-to-face health  
22  
23 services, the potential for digital-health to address at least some of the mounting unmet  
24  
25 clinical needs, has gained traction during the pandemic. Digital-health products (DHPs)  
26  
27 have been available for many years now, slowly increasing in popularity across a wide  
28  
29 range of health-related applications in almost all sectors of healthcare [12] National bodies  
30  
31 including the National Institute for Health and Care Excellence (NICE) are now providing  
32  
33 recommendations and guidelines on both the utilisation and evaluation of DHPs [13,14].  
34  
35 These technologies, which are widely accessible and fundamentally flexible, continue to  
36  
37 provide an additional means to achieve a continuity of care among those with unmet  
38  
39 medical needs [15]. With many clinicians now realising the full potential of these digital  
40  
41 tools, and becoming more accepting of DHPs as a potential therapeutic option during the  
42  
43 COVID-19 pandemic, including not just notifiable medical devices, but also simpler diet  
44  
45 and fitness applications, it is uncertain how consumer attitudes, interest and demand for  
46  
47 DHPs have changed during this period. Utilising data from the world's largest digital-health  
48  
49 evaluation formulary, provided by the Organisation for the Review of Care and Health  
50  
51  
52  
53  
54  
55  
56  
57  
58  
59  
60

1  
2  
3 Applications (ORCHA) [16]; with over 10,000 DHPs reviewed to date; the aim of this study  
4  
5 is to determine how internet searches for DHPs for various health conditions has changed  
6  
7 since COVID-19 lockdown measures were introduced in March 2020 and throughout the  
8  
9 pandemic. Furthermore, this study will also explore whether changes in search volumes for  
10  
11 DHPs differed by therapeutic area.  
12  
13  
14  
15  
16  
17  
18

## 19 **Materials and Methods**

20  
21  
22 The methodology for this study is a retrospective time-series analysis of real-world internet  
23  
24 searches for DHPs within ORCHA's Digital health library, split over two time periods;  
25  
26 before and after the initiation of COVID-19 lockdown procedures in the UK, which  
27  
28 commenced on March 23<sup>rd</sup> 2020. For the purpose of this analysis DHPs were defined as  
29  
30 health-apps, including all health-apps with the potential to improve health outcomes, not  
31  
32 limited to medical devices, but also including diet and fitness health-apps. Our aim was to  
33  
34 determine if searches for DHPs changed following the first phase of lockdown, and  
35  
36 throughout the pandemic. Additionally, the study aims to explore whether changes in search  
37  
38 volumes for DHPs differed by therapeutic area.  
39  
40  
41  
42  
43  
44

### 45 *DHP search data & categorisation*

46  
47 ORCHA are the world's largest independent reviewer of digital health products (DHPs),  
48  
49 providing a repository of DHPs, evaluated using a ~350 point objective 'yes' or 'no' scale.  
50  
51 These questions take into account a variety of factors including user experience and  
52  
53 usability, clinical assurance and evidence of effectiveness, clinical safety, and data privacy  
54  
55  
56  
57  
58  
59  
60

1  
2  
3 [16]. To date more than 10,000 DHPs have been reviewed and included on ORCHA's 'app-  
4 finder' website. During the period of analysis, ORCHA health-app libraries were procured  
5 by councils, NHS trusts, clinical commissioning groups (CCGs) and integrated care systems  
6 (ICSs) in approximately 70% of NHS regions, providing the ORCHA health-app library  
7 free to use, to healthcare providers and members of the public alike. Additionally, during  
8 this time period anyone in the United Kingdom could access the ORCHA health-app library  
9 free of charge by simply typing ORCHA into their chosen search engine. For the purpose of  
10 this study, user's digital-health search term data, used across all ORCHA Digital Health  
11 Libraries from 1<sup>st</sup> January 2019 to 31<sup>st</sup> December 2020, was collected using Google  
12 Analytics. We removed 2,486 searches which were exclusively alpha-numeric, clear typos,  
13 or which consisted of just two letters or less. Following this process there were 126,640 web  
14 searches for DHPs within the study period, equal to approximately 5,276 searches per  
15 month. From this group of 126,640 searches, we identified every unique search term,  
16 determining the frequency of use for each over the study period. In order to explore the  
17 different types of DHPs searched for, search terms were subsequently attributed to one of  
18 25 condition areas. These condition areas were identified following multi-disciplinary input  
19 from three healthcare professionals (a midwife, a pharmacy specialist lead, and an  
20 ophthalmologist) and a health economist, with the aim of covering a broad representation of  
21 functions and conditions throughout the human body. An iterative process was utilized  
22 where each contributor added to (or recommended removing conditions) from the  
23 contribution of the last. Once all contributors had the opportunity to recommend therapeutic  
24 areas for inclusion, a final discussion between all four contributors took place, at which  
25 point the condition areas were finalized. We developed an expansive list of search terms  
26  
27  
28  
29  
30  
31  
32  
33  
34  
35  
36  
37  
38  
39  
40  
41  
42  
43  
44  
45  
46  
47  
48  
49  
50  
51  
52  
53  
54  
55  
56  
57  
58  
59  
60

1  
2  
3 attributable to each of the 25 condition areas, using both MESH headings and condition-  
4 specific terms (such as insulin in the case of diabetes, or inhalers for asthma) following  
5 methodological guidance for the purpose of literature reviewing. Each of the four  
6 contributors then provided independent iterative curation of the search terms, creating a  
7 quality control chain. In the event that search terms were missed, they were added and  
8 synonyms provided. The search strings used to tag and classify the unique search terms into  
9 each of the 25 condition areas are provided in Supplementary File 1.  
10  
11  
12  
13  
14  
15  
16  
17  
18  
19  
20

21 Remaining terms which had not been initially attributed to one of the 25 condition areas  
22 were then attributed using an iterative two-phase tagging approach. Firstly, we utilised data  
23 from the Digital Health Libraries to identify the names of DHPs associated with each of the  
24 25 condition areas. We used a list of the names of the most commonly searched DHPs for  
25 each condition, which were then also added to the relevant search strings. This was  
26 supplemented by asking a team of several digital-health assessors to provide the names of  
27 any DHPs they could recall for each of the 25 condition areas. While most DHPs tended to  
28 include the name of the condition within the name of the DHP, and therefore would have  
29 been automatically attributed to a condition, this method was particularly useful for DHPs  
30 with names that did not obviously link to a condition area, such as Wysa® in the case of  
31 mental health, or Xploro® for oncology. Following this process, search terms which had not  
32 already been attributed to a condition area (untagged) were ordered from the most to least  
33 searched (frequency of searches) and reviewed by two independent researchers. Researchers  
34 manually descended the list of terms, and in the event terms were related to one of the 25  
35 condition areas, they were added to the pre-existing search strings. Due to the gamma  
36  
37  
38  
39  
40  
41  
42  
43  
44  
45  
46  
47  
48  
49  
50  
51  
52  
53  
54  
55  
56  
57  
58  
59  
60

1  
2  
3 distribution of search term frequency (non-negative with a significant positive skew),  
4  
5 reviewers stopped classifying search terms for any term with less than 10 searches over the  
6  
7 two-year period of investigation. This figure was the cut off for classification as it was at  
8  
9 this point that clear typos and alpha-numeric searches which could not clearly be linked to  
10  
11 either condition areas with any certainty, were most common.  
12  
13  
14  
15  
16  
17

### 18 19 *Statistical analysis*

20  
21 Given the differential time periods for data collection and analysis (~15 months before  
22  
23 lockdown measures were introduced in the United Kingdom on March 23<sup>rd</sup> 2020, and ~9  
24  
25 months after), search frequencies were standardised by determining the mean number of  
26  
27 searches per calendar month. The overall change in search frequency (and for DHPs  
28  
29 associated with each of the 25 condition areas), between the two time periods under  
30  
31 consideration, was determined by comparing the mean frequency of searches (per month)  
32  
33 pre and post-March 23<sup>rd</sup> 2020 (COVID-19 lockdown). A two-sample Poisson test was used  
34  
35 to identify if any changes in the volume of web searches for DHPs, both overall, and by  
36  
37 condition area, were statistically significant at the conventional 95% level. Data cleaning  
38  
39 was performed using Microsoft Office Excel 2013 (Microsoft ®, Redmond, Washington,  
40  
41 USA), with all statistical analyses conducted using Stata 14.  
42  
43  
44  
45  
46  
47  
48  
49  
50

### 51 *Ethical approval*

52  
53  
54  
55  
56  
57  
58  
59  
60

1  
2  
3 We used the ethical approval decision tool provided by the University of Manchester [17]  
4  
5 and following discussion among the scientific steering committee for the study, ethical  
6  
7 approval was not sought. The reason being that the study falls under market research using  
8  
9 secondary data, which was completely anonymous data, with no confidential, personal or  
10  
11 sensitive information and therefore no possible risk of disclosures. Additionally, we  
12  
13 received explicit consent from the data controller to access and utilize the data, with all  
14  
15 users of the ORCHA health-app library also consenting to the use of this data for the  
16  
17 purpose of research, as detailed in the privacy policy provided to users.  
18  
19  
20  
21  
22

### 23 *Patient and public involvement*

24  
25 For this retrospective study of real-world DHP search patterns, formal patient and public  
26  
27 involvement was not sought.  
28  
29  
30  
31  
32  
33  
34

## 35 **Results**

### 36 *Searches for DHPs*

37  
38 In the period prior to COVID-lockdown measures being introduced (January 1<sup>st</sup> 2019 to  
39  
40 March 23<sup>rd</sup> 2020), 36,685 searches for DHPs were undertaken using ORCHA Digital Health  
41  
42 Libraries, equivalent to 2,446 per month. As detailed in Table 1, DHPs dedicated to mental  
43  
44 health, diabetes, and healthy living were the most frequently searched for during this period.  
45  
46 In the period following the introduction of lockdown measures (March 24<sup>th</sup> 2020 onwards),  
47  
48 a total of 89,955 searches for DHPs took place, equivalent to 8,996 per month, a 343.4%  
49  
50 increase on the previous period (p<0.0001).  
51  
52  
53  
54  
55  
56  
57  
58  
59  
60

### Searches for DHPs by condition area

There was substantial variation in changes in DHP search frequency by condition area (pre vs post COVID-19 lockdown), as demonstrated in Table 1. COVID-19, MSK & physiotherapy, allergy, and fitness/diet and weight loss DHPs experienced ~4622%, ~2,036%, ~1,253%, and ~1,051% increases in monthly searches for DHPs following COVID-19 lockdown measures, the largest increases observed. Every condition area, other than carer support and guidance/info experienced a statistically significant increase in searches for DHPs in the period following COVID-19 lockdown measures.

Table 1: Comparison of search frequency pre & post Covid-19 lockdown measures, by condition area.

| Category                    | Searches per month                   |                                       | Increase (%) | Significance* |
|-----------------------------|--------------------------------------|---------------------------------------|--------------|---------------|
|                             | Pre-Lockdown <sup>1</sup><br>(mean=) | Post-Lockdown <sup>2</sup><br>(mean=) |              |               |
| COVID                       | 4                                    | 197                                   | 4622.4%      | p<0.01        |
| MSK + physio                | 34                                   | 683                                   | 2035.5%      | p<0.01        |
| Allergy                     | 4                                    | 45                                    | 1253.1%      | p<0.01        |
| Fitness, diet & weight loss | 320                                  | 1663                                  | 1050.8%      | p<0.01        |
| Gastroenterology            | 12                                   | 92                                    | 767.6%       | p<0.01        |
| Ears & hearing              | 22                                   | 152                                   | 700.0%       | p<0.01        |

|    |                                   |             |             |             |            |
|----|-----------------------------------|-------------|-------------|-------------|------------|
| 1  |                                   |             |             |             |            |
| 2  |                                   |             |             |             |            |
| 3  | Kidney                            | 4           | 27          | 632.3%      | p<0.01     |
| 4  | Children's health                 | 34          | 211         | 613.6%      | p<0.01     |
| 5  |                                   |             |             |             |            |
| 6  | Neurological & neurodevelopmental | 119         | 698         | 588.3%      | p<0.01     |
| 7  |                                   |             |             |             |            |
| 8  | Cancer                            | 22          | 131         | 581.1%      | p<0.01     |
| 9  | Women's health                    | 27          | 158         | 576.5%      | p<0.01     |
| 10 |                                   |             |             |             |            |
| 11 | Respiratory                       | 78          | 398         | 510.4%      | p<0.01     |
| 12 |                                   |             |             |             |            |
| 13 | Men's health                      | 4           | 18          | 487.9%      | p<0.01     |
| 14 | Heart                             | 31          | 131         | 422.9%      | p<0.01     |
| 15 | Dental                            | 3           | 13          | 399.3%      | p<0.01     |
| 16 |                                   |             |             |             |            |
| 17 | Pain & chronic fatigue            | 49          | 191         | 389.6%      | p<0.01     |
| 18 |                                   |             |             |             |            |
| 19 | Nose & throat                     | 1           | 5           | 363.6%      | p<0.01     |
| 20 |                                   |             |             |             |            |
| 21 | Mental health                     | 723         | 2536        | 350.7%      | p<0.01     |
| 22 |                                   |             |             |             |            |
| 23 | Pregnancy                         | 48          | 161         | 338.2%      | p<0.01     |
| 24 |                                   |             |             |             |            |
| 25 | Eyes & vision                     | 11          | 29          | 255.8%      | p<0.01     |
| 26 | Diabetes                          | 244         | 589         | 241.8%      | p<0.01     |
| 27 |                                   |             |             |             |            |
| 28 | Addiction                         | 136         | 274         | 201.4%      | p<0.01     |
| 29 |                                   |             |             |             |            |
| 30 | Sleep                             | 259         | 474         | 183.0%      | p<0.01     |
| 31 |                                   |             |             |             |            |
| 32 | Guidance & info                   | 21          | 16          | 74.3%       | p=0.64     |
| 33 |                                   |             |             |             |            |
| 34 | Carer                             | 45          | 28          | 63.2%       | p=0.14     |
| 35 | <b>Combined</b>                   | <b>2256</b> | <b>8920</b> | <b>395%</b> | <b>N/A</b> |
| 36 |                                   |             |             |             |            |
| 37 |                                   |             |             |             |            |

<sup>1</sup>Start January 2019 > March 23<sup>rd</sup> 2020 (~15 months)

<sup>2</sup>Start March 24<sup>th</sup> 2020 > End December 2020 (~9 months)

\*Significance determined using two-staged Poisson test

### *Searches for DHPs by condition area, over time*

While the increased frequency of searches for DHPs occurred immediately following the introduction of lockdown proceedings, as demonstrated within Figure 1; the interest in DHPs in different condition areas was sustained over the 9-month period following



1  
2  
3 COVID-19 lockdown measures. In total 23/25 (92%) of the condition areas analysed  
4  
5 experienced monthly search volumes at least 25% greater than pre-lockdown levels, 21/25  
6  
7 (84%) had monthly search volumes at least 50% greater, and 14/25 (56%) experienced  
8  
9 search volumes more than 100% greater than pre-lockdown levels.  
10  
11  
12  
13

14 Figure 1: How interest in digital health changed throughout the Covid-19 pandemic  
15  
16  
17  
18

## 19 **Discussion**

### 20 *Principal findings*

21  
22 The study provides a first-of-its-kind exploration of the impact of COVID-19, and the  
23  
24 ensuing difficulties in accessing face-to-face care, on consumer interest for digital-health  
25  
26 products (DHPs) under real-world conditions. Utilising two-years of retrospective data  
27  
28 (January 2019 to December 2020) from the world's largest formulary of DHPs, available to  
29  
30 healthcare providers and members of the public in the United Kingdom, we observed a  
31  
32 significant increase in searches for DHPs. Searches for DHPs increased by 343% from an  
33  
34 average 2,446 per month prior to COVID-19 lockdown measures being introduced, to an  
35  
36 average 8,996 per month in the 9-month period following the first COVID-19 lockdown.  
37  
38 Despite observing a statistically significant increase in searches for DHPs for all but two of  
39  
40 the 25 condition areas listed, increases in searches varied substantially by condition area,  
41  
42 with MSK & physiotherapy (2,036%), allergy (1,253%), and fitness, diet and weight loss  
43  
44 DHPs (1,051%) experiencing the greatest increases in searches. While searches for DHPs  
45  
46 should not be considered a perfect proxy for DHP acceptance, downloads, and usage, the  
47  
48 data presented here suggest that openness to considering DHPs, and at least researching  
49  
50  
51  
52  
53  
54  
55  
56  
57  
58  
59  
60

1  
2  
3 these tools for the purpose of independent condition and health management, increased  
4  
5 following Covid-19 lockdowns.  
6  
7  
8

9  
10 *Strengths and limitations*

11  
12 The strengths of this analysis include the fact that the dataset utilised includes over 125,000  
13  
14 searches for DHPs by members of the public from the United Kingdom, over a two-year  
15  
16 period. As such, when increases in searches for DHPs were observed post COVID-19  
17  
18 lockdown, the likelihood of this being down to random chance is minimised through the  
19  
20 extensive periods of analysis and the high frequency of search data, both pre and post-  
21  
22 lockdown, under consideration. Additionally, segmentation of search data into different  
23  
24 condition areas allowed exploration of internet search volumes for digital health  
25  
26 technologies in previously unexplored ways. There are however several limitations of this  
27  
28 analysis which must also be considered when interpreting the findings. Firstly, this analysis  
29  
30 focused exclusively on searches for DHPs. While this in itself is not a limitation, and was  
31  
32 the subject of the research question, searches do not always result in downloads and  
33  
34 subsequent usage, nor do they signify acceptance of such technologies, or a changing of  
35  
36 beliefs towards digital health. Therefore, while we can say with relative certainty that  
37  
38 interest in DHPs as proxied by internet search volumes, and consideration of their potential  
39  
40 usage as therapeutic options increased as a result of COVID-19 lockdown measures, we  
41  
42 cannot definitively confirm whether this increased interest generated tangible improvements  
43  
44 in health as a result. Secondly, while every attempt was made to ensure that the conditions  
45  
46 under consideration were varied and representative, utilizing an iterative process of  
47  
48 healthcare provider and researcher review; it is possible and also likely, that both important  
49  
50  
51  
52  
53  
54  
55  
56  
57  
58  
59  
60

1  
2  
3 and prevalent conditions may not have been addressed by the analysis. This may affect the  
4  
5 findings by underestimating (if web searches for the DHPs increased significantly) or  
6  
7 overestimating (if web searches hardly changed), the impact that COVID-19 had on web  
8  
9 searches for DHPs. Similarly, although the process used to identify terms to classify DHPs  
10  
11 was thorough and multi-disciplinary, it is possible that DHPs could have been mis-classified  
12  
13 or missed altogether. While it is unlikely that key terms were omitted, such as diabetes,  
14  
15 cancer, mental health or smoking, it is possible that less obvious names of DHPs were  
16  
17 missed, where the name of the DHP has no obvious medical link to the condition under  
18  
19 consideration. This may have led to an underestimation of searches for condition-specific  
20  
21 DHPs in the periods both pre and post COVID-19 lockdown. Finally, as ORCHA libraries  
22  
23 are not the only place on the internet to search for health-apps, we therefore cannot be sure  
24  
25 that the findings observed here would be reflected in the wider population, nor can we be  
26  
27 certain that the increased interest in searching for DHPs. Additionally, based on the existing  
28  
29 study structure, there is no guarantee that the findings observed here will continue to be  
30  
31 observed once the Covid-19 pandemic has concluded, something which future research will  
32  
33 need to address.  
34  
35  
36  
37  
38  
39  
40

#### 41 *Interpretation in light of other evidence*

42  
43 We found that searches for DHPs increased by 343%, a statistically significant increase  
44  
45 from 2,446 per month prior to COVID-19 lockdown measures, to 8,996 per month in the  
46  
47 nine-months following the first COVID-19 lockdown. Although this rise may plausibly be  
48  
49 attributed to a shift in treatment seeking behaviour for those experiencing denied or delayed  
50  
51 access to routine face-to-face appointments with HCPs [18-20], there could be alternative  
52  
53  
54  
55  
56  
57  
58  
59  
60

1  
2  
3 justifications for this observed increase in searches for DHPs. These include but are not  
4  
5 limited to, the widespread increase in acceptance of DHPs over time [21-23], and promotion  
6  
7 of this relatively new therapeutic medium by health authorities. Previous studies, including  
8  
9 two conducted by the authors of this study [24,25] have shown that recommendations from  
10  
11 health authorities to use digital health products, including the NHS and the National  
12  
13 Institute for Health and Care Excellence (NICE), can significantly enhance acceptance and  
14  
15 utilisation. Recently the UK has experienced a substantial increase in regulative clarity, and  
16  
17 with this, recommendations considering potential uses of digital health have increased  
18  
19 significantly; these include the recent release of the NHSX digital technology assessment  
20  
21 criteria (DTAC) [26], and revisions to the NICE evidence standards framework (ESF) [14].  
22  
23 As such, at least some of the increases seen here may have been attributable to latent shifts  
24  
25 in attitudes towards digital health, albeit accelerating them as a result of COVID-19.  
26  
27  
28  
29  
30  
31

32  
33 Another key finding of this study concerned the impact that lockdown measures may have  
34  
35 had, and across different condition areas, as the pandemic progressed. Initially in the United  
36  
37 Kingdom, leisure facilities, organized sports, and the requirement to stay home where  
38  
39 possible, with the exception of one period of exercise a day, led to individuals going out and  
40  
41 taking part in physical activity, whether direct, including organized sports, or indirect,  
42  
43 including walking to work, far less than previous. This indirectly may have made physical  
44  
45 exercise more 'attractive' as an activity, as one of the only permissible reasons to leave  
46  
47 home once a day. Therefore it is to be expected that the need for fitness DHPs increased, as  
48  
49 observed within this study. In the first three-months following the first period of lockdown,  
50  
51 internet searches for fitness-related DHPs increased by 2000%. As the pandemic  
52  
53  
54  
55  
56  
57  
58  
59  
60

1  
2 progressed, and people either worked from home more or were furloughed, which for many  
3 was a significant adjustment, the UK also observed a significant surge in alcohol  
4 consumption [4], with a corresponding increase in internet searches for DHPs centered  
5 around addiction, as observed in this study.  
6  
7  
8  
9  
10  
11  
12  
13

#### 14 *What does this mean for clinical practice?*

15  
16 Whilst it is unlikely that a face-to-face health service will ever be completely replaced by a  
17 virtual experience of any kind, there are clear signs that the healthcare system as we know it  
18 is on the verge of change. As evidenced by the findings of this study, it is clear that people  
19 are increasingly willing to consider digital health when contemplating seeking treatment for  
20 a variety of health conditions. DHPs offer the ability to gather more accurate timely  
21 information for healthcare appointments, allow advice to be reinforced and provide new  
22 convenient ways to connect with healthcare advice or professionals. Given the potential for  
23 a third wave of COVID-19 restrictions in light of new variants, and increased  
24 transmissibility, it is therefore critical that consumers are directed to safe, trusted and  
25 evidence-based solutions; if the demand for such technologies should arise. This is critical  
26 such that any benefits which may be realized either in the absence of, or in addition to face-  
27 to-face services, are not overshadowed or negated by the potential dangers of using  
28 potentially unsafe and unproven technologies. A large part of this process is informing, and  
29 enabling healthcare professionals to also recognise this opportunity, to become more  
30 actively involved in the provision of high-quality, trusted and safe DHPs for a variety of  
31 conditions. This is not limited solely to high functioning medical devices, but also to DHPs  
32 with the aim of improving lifestyle decisions and promoting healthy living, with interest in  
33  
34  
35  
36  
37  
38  
39  
40  
41  
42  
43  
44  
45  
46  
47  
48  
49  
50  
51  
52  
53  
54  
55  
56  
57  
58  
59  
60

1  
2  
3 DHPs from both ends of the spectrum increasingly significantly, as observed in this  
4  
5 analysis.  
6  
7  
8

9  
10 *Future research*

11  
12 Future research, which empirically explores attitudes towards digital health and the barriers  
13  
14 and facilitators to use among members of the public, is likely to be of significant value for  
15  
16 the NHS in realising its long term goals. This study has provided a basis for a hypothesis  
17  
18 that the interest in digital health increased immediately following the introduction of  
19  
20 COVID-19 restrictions. These restrictions undoubtedly impacted access to incumbent  
21  
22 services and therefore the argument may be made that DHPs were sought as an interim or  
23  
24 ‘placeholder’ measure in order to fulfill unmet clinical needs. While this is a plausible  
25  
26 hypothesis, it does require confirming, while the future role of DHPs beyond the pandemic,  
27  
28 as things slowly begin to normalize, also requires exploration. Attention should be paid to  
29  
30 the specifics of DHPs and how willingness to use such technologies differs by functionality.  
31  
32 It is plausible that members of the public were happy to use DHPs which had limited  
33  
34 functionality in the absence of being able to visit a qualified HCP, but would have concerns  
35  
36 about using DHPs classed as medical devices. This ‘classification’ of DHPs, and the  
37  
38 different ‘types’ of DHP consumers are willing to use, is a largely unexplored area of  
39  
40 research. Unfortunately this could not be discerned in this analysis and should be addressed,  
41  
42 in addition to the other points raised above, before we can determine whether the observed  
43  
44 increase in searches for DHPs was a one-time occurrence, or indeed, the start of a new era  
45  
46 of digital medicine.  
47  
48  
49  
50  
51  
52  
53  
54  
55  
56  
57  
58  
59  
60

## Conclusion

The COVID-19 pandemic has profoundly disrupted the routine delivery of healthcare, contributing to unmet clinical needs and significant increases in related sequelae. Digital health has been posed as one solution to address unmet needs resulting from COVID-19. This study, which explored real-world interest in DHPs over a two-year period, has demonstrated significant increases in internet searches for DHPs by members of the UK population since COVID-19, signifying an increased interest in this potential therapeutic medium. Searches for DHPs increased by 343%, with technologies dedicated to mental health and fitness among those experiencing the greatest increases. Future research should clarify whether this increased interest has also resulted in increased acceptance and utilisation of these technologies also.

## References

1. Senbekov, M, Saliev, T, Bukeyeva, Z, Almabayeva, A, Zhanaliyeva, M, Aitenova, N, Toishibekov, Y, Fakhradiyev, I (2020). The Recent Progress and Applications of Digital Technologies in Healthcare: A Review. *Int J Telemed Appl*, 2020:8830200.
2. Schmid-Küpke, NK, Matysiak-Klose, D, Siedler, A, Felgendreff, L, Wieler, L, Thaiss, HM, Betsch, C (2021). Cancelled routine vaccination appointments due to COVID-19 pandemic in Germany. *Vaccine X*, 8:100094.
3. Spalletta, G, Porcari, DE, Banaj, N, Ciullo, V, Palmer, K (2020). Effects of COVID-19 Infection Control Measures on Appointment Cancellation in an Italian Outpatient Memory Clinic. *Front Psychiatry*, 11:599844.

- 1  
2  
3 4. Mansfield, KE, Mathur, R, Tazare, J, Henderson, AD, Mulick, AR, Carreira, H,  
4  
5 Matthews, AA, Bidulka, P, Gayle, A, Forbes, H, Cook, S, Wong, AYS, Strongman,  
6  
7 H, Wing, K, Warren-Gash, C, Cadogan, SL, Smeeth, L, Hayes, JF, Quint, JK,  
8  
9 McKee, M, Langan, SM (2021). Indirect acute effects of the COVID-19 pandemic  
10  
11 on physical and mental health in the UK: a population-based study. *Lancet Digit*  
12  
13 *Health*, 3, 4:e217-e230.
- 14  
15  
16 5. Shayganfard, M, Mahdavi, F, Haghighi, M, Sadeghi Bahmani, D, Brand, S (2020).  
17  
18 Health Anxiety Predicts Postponing or Cancelling Routine Medical Health Care  
19  
20 Appointments among Women in Perinatal Stage during the Covid-19 Lockdown. *Int*  
21  
22 *J Environ Res Public Health*, 17, 21:no page given.
- 23  
24  
25 6. Mehrotra, A; Chernew, M; Linetsky, D; Hatch, H; Cutler, D; Schneider, EC (2020).  
26  
27 The Impact of the COVID-19 Pandemic on Outpatient Care: Visits Return to  
28  
29 Prepandemic Levels, but Not for All Providers and Patients. The commonwealth  
30  
31 fund.
- 32  
33  
34 7. The hidden impact of COVID-19 on patient care in the NHS in England. (2020).  
35  
36 The British Medical Association. Available at:  
37  
38 [https://www.bma.org.uk/media/2841/the-hidden-impact-of-covid\\_web-pdf.pdf](https://www.bma.org.uk/media/2841/the-hidden-impact-of-covid_web-pdf.pdf)  
39  
40
- 41  
42 8. The Lancet Infectious Diseases, (2020). The intersection of COVID-19 and mental  
43  
44 health. *Lancet Infect Dis*, 20, 11:1217.
- 45  
46 9. Holmes, EA, O'Connor, RC, Perry, VH, Tracey, I, Wessely, S, Arseneault, L,  
47  
48 Ballard, C, Christensen, H, Cohen Silver, R, Everall, I, Ford, T, John, A, Kabir, T,  
49  
50 King, K, Madan, I, Michie, S, Przybylski, AK, Shafran, R, Sweeney, A, Worthman,  
51  
52 CM, Yardley, L, Cowan, K, Cope, C, Hotopf, M, Bullmore, E (2020).  
53  
54  
55  
56  
57  
58  
59  
60



- 1  
2  
3 Multidisciplinary research priorities for the COVID-19 pandemic: a call for action  
4  
5 for mental health science. *Lancet Psychiatry*, 7, 6:547-560.  
6
- 7 10. Cancer Research UK. Lung cancer risks becoming ‘forgotten disease’ of the  
8  
9 coronavirus pandemic. (2020). Available at:  
10  
11 [https://www.cancerresearchuk.org/about-us/cancer-news/news-report/2020-09-17-](https://www.cancerresearchuk.org/about-us/cancer-news/news-report/2020-09-17-lung-cancer-risks-becoming-forgotten-disease-of-the-coronavirus-pandemic)  
12  
13 [lung-cancer-risks-becoming-forgotten-disease-of-the-coronavirus-pandemic](https://www.cancerresearchuk.org/about-us/cancer-news/news-report/2020-09-17-lung-cancer-risks-becoming-forgotten-disease-of-the-coronavirus-pandemic)  
14  
15
- 16 11. Maringe, C, Spicer, J, Morris, M, Purushotham, A, Nolte, E, Sullivan, R, Rachet, B,  
17  
18 Aggarwal, A (2020). The impact of the COVID-19 pandemic on cancer deaths due  
19  
20 to delays in diagnosis in England, UK: a national, population-based, modelling  
21  
22 study. *Lancet Oncol*, 21, 8:1023-1034.  
23  
24
- 25 12. Gordon, WJ, Landman, A, Zhang, H, Bates, DW (2020). Beyond validation: getting  
26  
27 health apps into clinical practice. *NPJ Digit Med*, 3:14.  
28  
29
- 30 13. The National Institute for Health and Care Excellence (NICE). Evidence standards  
31  
32 framework for digital health products. Available at:  
33  
34 [https://www.nice.org.uk/about/what-we-do/our-programmes/evidence-standards-](https://www.nice.org.uk/about/what-we-do/our-programmes/evidence-standards-framework-for-digital-health-technologies)  
35  
36 [framework-for-digital-health-technologies](https://www.nice.org.uk/about/what-we-do/our-programmes/evidence-standards-framework-for-digital-health-technologies)  
37  
38
- 39 14. The National Institute for Health and Care Excellence (NICE). NG183. Behaviour  
40  
41 change: digital and mobile health interventions. 2020. Available at:  
42  
43 <https://www.nice.org.uk/guidance/ng183/documents/draft-guideline>  
44  
45
- 46 15. Banskota, S, Healy, M, Goldberg, EM (2020). 15 Smartphone Apps for Older  
47  
48 Adults to Use While in Isolation During the COVID-19 Pandemic. *West J Emerg*  
49  
50 *Med*, 21, 3:514-525.  
51  
52
- 53 16. ORCHA. Available at: [www.orchhealth.com](http://www.orchhealth.com)  
54  
55  
56  
57  
58  
59  
60

- 1  
2  
3 17. The University of Manchester: Ethical Approval.  
4  
5 <https://www.manchester.ac.uk/research/environment/governance/ethics/approval/>.  
6  
7 Accessed 12<sup>th</sup> January 2021.  
8  
9  
10 18. Iyengar, K, Upadhyaya, GK, Vaishya, R, Jain, V (2020). COVID-19 and  
11 applications of smartphone technology in the current pandemic. *Diabetes Metab*  
12 *Syndr*, 14, 5:733-737.  
13  
14  
15  
16 19. Vidal-Alaball, J, Acosta-Roja, R, Pastor Hernández, N, Sanchez Luque, U,  
17 Morrison, D, Narejos Pérez, S, Perez-Llano, J, Salvador Vèrges, A, López Seguí,  
18 F (2020). Telemedicine in the face of the COVID-19 pandemic. *Aten Primaria*, 52,  
19 6:418-422.  
20  
21  
22  
23  
24  
25  
26 20. Monaghesh, E, Hajizadeh, A (2020). The role of telehealth during COVID-19  
27 outbreak: a systematic review based on current evidence. *BMC Public Health*, 20,  
28 1:1193.  
29  
30  
31  
32  
33 21. Simpson, AJ, Honkoop, PJ, Kennington, E, Snoeck-Stroband, JB, Smith, I, East, J,  
34 Coleman, C, Caress, A, Chung, KF, Sont, JK, Usmani, O, Fowler, SJ (2017).  
35 Perspectives of patients and healthcare professionals on mHealth for asthma self-  
36 management. *Eur Respir J*, 49, 5:no page given.  
37  
38  
39  
40  
41  
42 22. Kong, T, Scott, MM, Li, Y, Wichelman, C (2020). Physician attitudes towards-and  
43 adoption of-mobile health. *Digit Health*, 6:2055207620907187.  
44  
45  
46  
47 23. Rowland, SP, Fitzgerald, JE, Holme, T, Powell, J, McGregor, A (2020). What is the  
48 clinical value of mHealth for patients?. *NPJ Digit Med*, 3:4.  
49  
50  
51  
52  
53  
54  
55  
56  
57  
58  
59  
60

- 1  
2  
3 24. Leigh, S, Ashall-Payne, L, Andrews, T (2020). Barriers and Facilitators to the  
4  
5 Adoption of Mobile Health Among Health Care Professionals From the United  
6  
7 Kingdom: Discrete Choice Experiment. *JMIR Mhealth Uhealth*, 8, 7:e17704.  
8  
9  
10 25. Leigh, S, Ashall-Payne, L (2019). The role of health-care providers in mHealth  
11  
12 adoption. *Lancet Digit Health*, 1, 2:e58-e59.  
13  
14 26. NHSX. Digital Technology Assessment Criteria (DTAC).  
15  
16 [https://www.nhsx.nhs.uk/key-tools-and-info/digital-technology-assessment-criteria-](https://www.nhsx.nhs.uk/key-tools-and-info/digital-technology-assessment-criteria-dtac/)  
17  
18 [dtac/](https://www.nhsx.nhs.uk/key-tools-and-info/digital-technology-assessment-criteria-dtac/)  
19  
20  
21  
22  
23

## 24 25 **Ethical approval**

26  
27 We used the ethical approval decision tool provided by the University of Manchester [17]  
28  
29 and following discussion among the scientific steering committee for the study, ethical  
30  
31 approval was not sought. The reason being that the study falls under market research using  
32  
33 secondary data, which was completely anonymous data, with no confidential, personal or  
34  
35 sensitive information and therefore no possible risk of disclosures. Additionally, we  
36  
37 received explicit consent from the data controller to access and utilize the data, with all  
38  
39 users of the ORCHA health-app library also consenting to the use of this data for the  
40  
41 purpose of research, as detailed in the privacy policy provided to users.  
42  
43  
44  
45  
46  
47

## 48 49 **Availability of data and materials**

50  
51 The data that support the findings of this study can be made available upon request  
52  
53  
54  
55  
56  
57  
58  
59  
60

## Conflicts of interest

The authors declare that they have no conflicts of interest.

## Funding

No funding was sought

## Author statement

SL, TA and LAP devised the study. RD led the data collection. LL and CC provided curation of the data. RD, SL & SS planned and conducted the statistical analysis. SL, SS, RD, LL and CC drafted the manuscript. All authors read and approved the final manuscript.

## Acknowledgments

None

1  
2  
3  
4  
5  
6  
7  
8  
9  
10  
11  
12  
13  
14  
15  
16  
17  
18  
19  
20  
21  
22  
23  
24  
25  
26  
27  
28  
29  
30  
31  
32  
33  
34  
35  
36  
37  
38  
39  
40  
41  
42  
43  
44  
45  
46  
47  
48  
49  
50  
51  
52  
53  
54  
55  
56  
57  
58  
59  
60



How demand for digital health changed throughout the Covid-19 pandemic

## Technical Appendix – Search terms used to identify condition-specific searches for DHTs

### Addiction

abstinen\*, addict\*, alcohol\*, booze, cessation, cig\*, cigarette, drink\*, kwit, my quit route, nicotin\*, quit, quit genius, smok\*, tobacc\*, units

### Allergy

allerg\*, hay fever, hayfever, intoleran\*, itch\*, rash, sneez, wheez

### Carer

Carer

### Cancer

blastoma, cancer\*, carcinoma, chemo\*, leukaem\*, leukem\*, lymphom\*, malig\*, melanom\*, mole, my dignio, mydignio, myeloma, oncology, owise, radiotherapy, skinvision, tumor, tumour, untire, vinehealth

### Children's health

apart of me, baby, brush DJ, catch app, child\*, glue ear, handi, huckleberry, infant\*, kids, kooth, little journey, moshi, mycognition ED, neonat\*, paed\*, pediatric, teen\*, thinkninja, toddl\*, worrinots, xploro

### COVID

covid, corona, n-Cov\*

**Dental**

braces, brush\*, calculus, cavities, cavity, decay, dental, dentist, denture, enamel, gingivitis, incisor, jaw, mandib\*, maxilla, molar,,al health,,al hygiene,,thodont\*, palate, periodontal, periodontitis, plaque, root canal, teeth, tooth, veneer

**Diabetes search terms**

blood sugar, blood glucose, diab\*, freestyle, glycaemi\*, glyce\*mi\*, hba1c, hedia, hypergly\*, hypogly\*, insulin, intellin, libre, my desmond, onetouch, oviva, retina risk, SMBG, sugar, sugr, t1d, t1dm, t2d, t2dm, type1, type-1, type2, type-2

**Diet & weight loss search terms**

activ\*, bmi, body mass index, calorie\*, celiac, coeliac, couch, Diet\*, eat\*, fasting, fit bit, fitbit, food\*, gluten, gojauntly, healthy living, lincus, liva, meal\*, mutu, myfitnesspal, nike, noom, nutrition\*, obes\*, one you, oneyou, overweight, protein, recipe\*, second nature, span health, vegan, weigh\*

**Ears & hearing**

Deaf\*, ear, hear\*, meniere, tinnitus, vertigo,

**Eyes & vision**

amblyopia, cataract, eye\*, glaucoma, macular, myopia, ophthal\*, optom\*, presbyopia, retina\*, retino\*, vision, visual

**Fitness search terms**

Activ\*, cardio, exer\*, fit\*, garmin, gym, komoot, madbarz, moves4me, peloton, pilates, push up, run, strava, stretch\*, walking, work out, yoga

**Gastroenterology**

bloat\*, bowel, colitis, constip\*, crohn\*, diarrh\*, digest\*, FODMAP, gall stone, gallstone,  
gastroenterol\*, gastrointestinal, gut, hemorrhoid\*, haemorrhoid\*, heart burn, heartburn, IBD, IBS,  
indigest\*, intestin\*, reflux, stomach, zemediy

**Heart**

angina, arrhythmia, atrial, beats per, blood pressure, BP, bpm, cardiac, cardiology, cardiovascular,  
chest pain, cholesterol, coronary, ECG, fibrilcheck, fibril\*, heart, hyperlipid\*, hypertens\*, pacemaker,  
pulse

**Info & guidance**

guidance, info\*

**Kidney disease**

Acr, kidney ,renal, urinalysis,

**Men's health**

Erect\*, man\*, men\*, penis, penil\*, prostate, testic\*, testis,

**Mental health search terms**

7 cups, anger, anx\*, big white wall, bipolar, blues, calm, catch, CBT, chill panda, clear fear,  
cognitive, cognitive behavioral, cognitive behavioural, combined minds, counselling, cove, daylight,  
depress\*, distract, drjulian, equoo, esteem, fear, feeling good, grief, happi\*, happy\*, head space, ieso,  
kooth, loneliness, lonely, mania, meditat\*, mee two, Ment\*, mind, mindful, mindset, mind shift,  
mood, moshi, my therapy, obsessive, obsessive-compulsive, obsessive compulsive , OCD, pacifica,  
panic, personality disorder, phobia, psychiat\*, psycho\*, PTSD, relax, schizophrenia, sidekick, silver  
cloud, stay alive, stress\*, suicid\*, think ninja, thrive, trauma, woebot, worry, wysa, youper



### **Musculoskeletal search terms**

ankle, arthrit\*, back, bone, chiroprac, elbow, gout, hip, joint\*, knee, MSK, Musculo\*, osteo\*,  
physiapp, physio\*, physitrack, rehab\*, rheu\*, shoulder\*, viatherapy, wrist

### **Neurological**

ADHD, alzheimer\*, aphasia, attention deficit, autis\*, brain\*, cerebral, cerebro, cognition, CVA, CVE,  
demen\*, dyslexia, dysphagia, elevate, epilep\*, grey matter, head ache, headache, learning difficulty,  
learning disability, lumosity, m.s, memor, migraine, MS, multiple sclerosis, neuro\*, paraesthesia,  
parkinson\*, speech, stammer, stroke, swallow

### **Nose & throat**

Dysphonia, laryn\*, nasal, nose, pharyn\*, strep\*, throat, tonsil\*, vocal,

### **Pain**

ache, CRPS, Fatigue, Fibromyalgia, hurt\*, myalgia, ouchie, pain\*, sciatica, sore\*

### **Pregnancy**

abortion, antenatal, baby, breast start, breastfeed\*, conceiv\*, concep\*, conciev\*, eclamp\*, fertil\*,  
intrapartum, IVF, lactapp, matern\*, miscarr\*, mum, mush, natural cycles, neonatal, perinatal,  
postnatal, postpartum, pre eclamp\*, pre-eclamp, preeclamp\*, preg\*, reprod\*

### **Respiratory search terms**

air way, airway, asth\*, breath\*, bronch\*, COPD, cough\*, cystic fibrosis, dyspnoea, elfy, hailie,  
inhaler, lung\*, nuvoair, peak flow, pneum\*, pulmonary, rafi tone, respiratory, triumf, zephyr guide

### **Self-harm**

Distract, harm, self harm, self-harm, stay alive, suicide\*

**Sleep search terms**

feeling good, headspace, insom\*, moshi, nightmare, night terror, pzizz, Sleep\*, snor\*

**Women's health**

breast\*, cervical, cervix, continence, contracept\*, ferly, flo, flow, gynae\*, gyne\*, hot flashes,  
incontinen\*, libido, menopaus\*, menstrua\*, mutu, natural cycles, night sweats, obstetri\*, ovarian,  
ovary, ovul\*, painful intercourse, painful sex, PCOS, pelvic, period, sexual health, squeezezy, woman,  
women

For peer review only

STROBE Statement—Checklist of items that should be included in reports of *cohort studies*

|                              | Item No | Recommendation                                                                                                                                                                                                                                                                                                         | Page No                                                                                      |
|------------------------------|---------|------------------------------------------------------------------------------------------------------------------------------------------------------------------------------------------------------------------------------------------------------------------------------------------------------------------------|----------------------------------------------------------------------------------------------|
| <b>Title and abstract</b>    | 1       | (a) Indicate the study's design with a commonly used term in the title or the abstract<br>(b) Provide in the abstract an informative and balanced summary of what was done and what was found                                                                                                                          | 1 & 2                                                                                        |
| <b>Introduction</b>          |         |                                                                                                                                                                                                                                                                                                                        |                                                                                              |
| Background/rationale         | 2       | Explain the scientific background and rationale for the investigation being reported                                                                                                                                                                                                                                   | 4 & 5                                                                                        |
| Objectives                   | 3       | State specific objectives, including any prespecified hypotheses                                                                                                                                                                                                                                                       | 5                                                                                            |
| <b>Methods</b>               |         |                                                                                                                                                                                                                                                                                                                        |                                                                                              |
| Study design                 | 4       | Present key elements of study design early in the paper                                                                                                                                                                                                                                                                | 6                                                                                            |
| Setting                      | 5       | Describe the setting, locations, and relevant dates, including periods of recruitment, exposure, follow-up, and data collection                                                                                                                                                                                        | 7                                                                                            |
| Participants                 | 6       | (a) Give the eligibility criteria, and the sources and methods of selection of participants. Describe methods of follow-up<br>(b) For matched studies, give matching criteria and number of exposed and unexposed                                                                                                      | 7                                                                                            |
| Variables                    | 7       | Clearly define all outcomes, exposures, predictors, potential confounders, and effect modifiers. Give diagnostic criteria, if applicable                                                                                                                                                                               | 8 & 9                                                                                        |
| Data sources/<br>measurement | 8*      | For each variable of interest, give sources of data and details of methods of assessment (measurement). Describe comparability of assessment methods if there is more than one group                                                                                                                                   | 7 & 8                                                                                        |
| Bias                         | 9       | Describe any efforts to address potential sources of bias                                                                                                                                                                                                                                                              | 7 & 8                                                                                        |
| Study size                   | 10      | Explain how the study size was arrived at                                                                                                                                                                                                                                                                              | 7                                                                                            |
| Quantitative variables       | 11      | Explain how quantitative variables were handled in the analyses. If applicable, describe which groupings were chosen and why                                                                                                                                                                                           | 8                                                                                            |
| Statistical methods          | 12      | (a) Describe all statistical methods, including those used to control for confounding<br>(b) Describe any methods used to examine subgroups and interactions<br>(c) Explain how missing data were addressed<br>(d) If applicable, explain how loss to follow-up was addressed<br>(e) Describe any sensitivity analyses | 8                                                                                            |
| <b>Results</b>               |         |                                                                                                                                                                                                                                                                                                                        |                                                                                              |
| Participants                 | 13*     | (a) Report numbers of individuals at each stage of study—eg numbers potentially eligible, examined for eligibility, confirmed eligible, included in the study, completing follow-up, and analysed<br>(b) Give reasons for non-participation at each stage<br>(c) Consider use of a flow diagram                        | 10                                                                                           |
| Descriptive data             | 14*     | (a) Give characteristics of study participants (eg demographic, clinical, social) and information on exposures and potential confounders                                                                                                                                                                               | N/A (time-series analysis). In absence of time-series checklist, a cohort study was the next |

1  
2  
3  
4  
5  
6  
7  
8  
9  
10  
11  
12  
13  
14  
15  
16  
17  
18  
19  
20  
21  
22  
23  
24  
25  
26  
27  
28  
29  
30  
31  
32  
33  
34  
35  
36  
37  
38  
39  
40  
41  
42  
43  
44  
45  
46  
47  
48  
49  
50  
51  
52  
53  
54  
55  
56  
57  
58  
59  
60

|              |     |                                                                                     |                   |
|--------------|-----|-------------------------------------------------------------------------------------|-------------------|
|              |     | (b) Indicate number of participants with missing data for each variable of interest | best alternative. |
|              |     | (c) Summarise follow-up time (eg, average and total amount)                         |                   |
| Outcome data | 15* | Report numbers of outcome events or summary measures over time                      | 10 & 11           |

For peer review only

|    |                          |    |                                                                                                                                                                                                              |         |
|----|--------------------------|----|--------------------------------------------------------------------------------------------------------------------------------------------------------------------------------------------------------------|---------|
| 1  | Main results             | 16 | (a) Give unadjusted estimates and, if applicable, confounder-adjusted estimates and their precision (eg, 95% confidence interval). Make clear which confounders were adjusted for and why they were included | 10 & 11 |
| 2  |                          |    | (b) Report category boundaries when continuous variables were categorized                                                                                                                                    |         |
| 3  |                          |    | (c) If relevant, consider translating estimates of relative risk into absolute risk for a meaningful time period                                                                                             |         |
| 4  |                          |    |                                                                                                                                                                                                              |         |
| 5  |                          |    |                                                                                                                                                                                                              |         |
| 6  |                          |    |                                                                                                                                                                                                              |         |
| 7  |                          |    |                                                                                                                                                                                                              |         |
| 8  |                          |    |                                                                                                                                                                                                              |         |
| 9  | Other analyses           | 17 | Report other analyses done—eg analyses of subgroups and interactions, and sensitivity analyses                                                                                                               | 10 & 11 |
| 10 |                          |    |                                                                                                                                                                                                              |         |
| 11 | <b>Discussion</b>        |    |                                                                                                                                                                                                              |         |
| 12 |                          |    |                                                                                                                                                                                                              |         |
| 13 | Key results              | 18 | Summarise key results with reference to study objectives                                                                                                                                                     | 11      |
| 14 | Limitations              | 19 | Discuss limitations of the study, taking into account sources of potential bias or imprecision. Discuss both direction and magnitude of any potential bias                                                   | 12 & 13 |
| 15 |                          |    |                                                                                                                                                                                                              |         |
| 16 | Interpretation           | 20 | Give a cautious overall interpretation of results considering objectives, limitations, multiplicity of analyses, results from similar studies, and other relevant evidence                                   | 13-15   |
| 17 |                          |    |                                                                                                                                                                                                              |         |
| 18 |                          |    |                                                                                                                                                                                                              |         |
| 19 | Generalisability         | 21 | Discuss the generalisability (external validity) of the study results                                                                                                                                        | 12 & 13 |
| 20 |                          |    |                                                                                                                                                                                                              |         |
| 21 | <b>Other information</b> |    |                                                                                                                                                                                                              |         |
| 22 |                          |    |                                                                                                                                                                                                              |         |
| 23 | Funding                  | 22 | Give the source of funding and the role of the funders for the present study and, if applicable, for the original study on which the present article is based                                                | 21      |
| 24 |                          |    |                                                                                                                                                                                                              |         |

\*Give information separately for exposed and unexposed groups.

**Note:** An Explanation and Elaboration article discusses each checklist item and gives methodological background and published examples of transparent reporting. The STROBE checklist is best used in conjunction with this article (freely available on the Web sites of PLoS Medicine at <http://www.plosmedicine.org/>, Annals of Internal Medicine at <http://www.annals.org/>, and Epidemiology at <http://www.epidem.com/>). Information on the STROBE Initiative is available at <http://www.strobe-statement.org>.
