# Supplementary material for: Web-based internet searches for digital health products in the United Kingdom before and during the COVID-19 pandemic: a time-series analysis using app libraries from the Organisation for the Review of Care and Health Applications (ORCHA)
Source: PubMed Central journal article supplement — BMJ Open. 2021 Oct 11;11(10):e053891. doi: 10.1136/bmjopen-2021-053891 (PMC8506045; doi:10.1136/bmjopen-2021-053891), 2021-10-11
Supplement: bmjopen-2021-053891supp001.pdf [file bmjopen-2021-053891supp001.pdf]

## **Technical Appendix – Search terms used to identify condition-specific searches for DHTs**

### **Addiction**

abstinen\*, addict\*, alcohol\*, booze, cessation, cig\*, cigarette, drink\*, kwit, my quit route, nicotin\*, quit, quit genius, smok\*, tobacc\*, units

### **Allergy**

allerg\*, hay fever, hayfever, intoleran\*, itch\*, rash, sneez, wheez

### **Carer**

Carer

### **Cancer**

blastoma, cancer\*, carcinoma, chemo\*, leukaem\*, leukem\*, lymphom\*, malig\*, melanom\*, mole, my dignio, mydignio, myeloma, oncology, owise, radiotherapy, skinvision, tumor, tumour, untire, vinehealth

### **Children's health**

apart of me, baby, brush DJ, catch app, child\*, glue ear, handi, huckleberry, infant\*, kids, kooth, little journey, moshi, mycognition ED, neonat\*, paed\*, pediatric, teen\*, thinkninja, toddl\*, worrinots, xploro

### **COVID**

covid, corona, n-Cov\*

**Dental**

braces, brush\*, calculus, cavities, cavity, decay, dental, dentist, denture, enamel, gingivitis, incisor, jaw, mandib\*, maxilla, molar, oral health, oral hygiene, orthodont\*, palate, periodontal, periodontitis, plaque, root canal, teeth, tooth, veneer

**Diabetes search terms**

blood sugar, blood glucose, diab\*, freestyle, glycaemi\*, glyce\*mi\*, hba1c, hedia, hypergly\*, hypogly\*, insulin, intellin, libre, my desmond, onetouch, oviva, retina risk, SMBG, sugar, sugr, t1d, t1dm, t2d, t2dm, type1, type-1, type2, type-2

**Diet & weight loss search terms**

activ\*, bmi, body mass index, calorie\*, celiac, coeliac, couch, Diet\*, eat\*, fasting, fit bit, fitbit, food\*, gluten, gojauntly, healthy living, lincus, liva, meal\*, mutu, myfitnesspal, nike, noom, nutrition\*, obes\*, one you, oneyou, overweight, protein, recipe\*, second nature, span health, vegan, weigh\*

**Ears & hearing**

Deaf\*, ear, hear\*, meniere, tinnitus, vertigo,

**Eyes & vision**

amblyopia, cataract, eye\*, glaucoma, macular, myopia, ophthal\*, optom\*, presbyopia, retina\*, retino\*, vision, visual

**Fitness search terms**

Activ\*, cardio, exer\*, fit\*, garmin, gym, komoot, madbarz, moves4me, peloton, pilates, push up, run, strava, stretch\*, walking, work out, yoga

**Gastroenterology**

bloat\*, bowel, colitis, constip\*, crohn\*, diarrh\*, digest\*, FODMAP, gall stone, gallstone, gastroenterol\*, gastrointestinal, gut, hemorrhoid\*, haemorrhoid\*, heart burn, heartburn, IBD, IBS, indigest\*, intestin\*, reflux, stomach, zemediy

**Heart**

angina, arrhythmia, atrial, beats per, blood pressure, BP, bpm, cardiac, cardiology, cardiovascular, chest pain, cholesterol, coronary, ECG, fibrilcheck, fibril\*, heart, hyperlipid\*, hypertens\*, pacemaker, pulse

**Info & guidance**

guidance, info\*

**Kidney disease**

Acr, kidney ,renal, urinalysis,

**Men's health**

Erect\*, man\*, men\*, penis, penil\*, prostate, testic\*, testis,

**Mental health search terms**

7 cups, anger, anx\*, big white wall, bipolar, blues, calm, catch, CBT, chill panda, clear fear, cognitive, cognitive behavioral, cognitive behavioural, combined minds, counselling, cove, daylight, depress\*, distract, drjulian, equoo, esteem, fear, feeling good, grief, happi\*, happy\*, head space, ieso, kooth, loneliness, lonely, mania, meditat\*, mee two, Ment\*, mind, mindful, mindset, mind shift, mood, moshi, my therapy, obsessive, obsessive-compulsive, obsessive compulsive , OCD, pacifica, panic, personality disorder, phobia, psychiat\*, psycho\*, PTSD, relax, schizophrenia, sidekick, silver cloud, stay alive, stress\*, suicid\*, think ninja, thrive, trauma, woebot, worry, wysa, youper

**Musculoskeletal search terms**

ankle, arthrit\*, back, bone, chiroprac, elbow, gout, hip, joint\*, knee, MSK, Musculo\*, osteo\*,  
physiapp, physio\*, physitrack, rehab\*, rheu\*, shoulder\*, viatherapy, wrist

**Neurological**

ADHD, alzheimer\*, aphasia, attention deficit, autis\*, brain\*, cerebral, cerebro, cognition, CVA, CVE,  
demen\*, dyslexia, dysphagia, elevate, epilep\*, grey matter, head ache, headache, learning difficulty,  
learning disability, lumosity, m.s, memor, migraine, MS, multiple sclerosis, neuro\*, paraesthesia,  
parkinson\*, speech, stammer, stroke, swallow

**Nose & throat**

Dysphonia, laryn\*, nasal, nose, pharyn\*, strep\*, throat, tonsil\*, vocal,

**Pain**

ache, CRPS, Fatigue, Fibromyalgia, hurt\*, myalgia, ouchie, pain\*, sciatica, sore\*

**Pregnancy**

abortion, antenatal, baby, breast start, breastfeed\*, conceiv\*, concep\*, conciev\*, eclamp\*, fertil\*,  
intrapartum, IVF, lactapp, matern\*, miscarri\*, mum, mush, natural cycles, neonatal, perinatal,  
postnatal, postpartum, pre eclamp\*, pre-eclamp, preeclamp\*, preg\*, reprod\*

**Respiratory search terms**

air way, airway, asth\*, breath\*, bronch\*, COPD, cough\*, cystic fibrosis, dyspnoea, elfy, hailie,  
inhaler, lung\*, nuvoair, peak flow, pneum\*, pulmonary, rafi tone, respiratory, triumf, zephyr guide

**Self-harm**

Distract, harm, self harm, self-harm, stay alive, suicide\*

**Sleep search terms**

feeling good, headspace, insom\*, moshi, nightmare, night terror, pzizz, Sleep\*, snor\*

**Women's health**

breast\*, cervical, cervix, continence, contracept\*, ferly, flo, flow, gynae\*, gyne\*, hot flashes, incontinen\*, libido, menopaus\*, menstrua\*, mutu, natural cycles, night sweats, obstetri\*, ovarian, ovary, ovul\*, painful intercourse, painful sex, PCOS, pelvic, period, sexual health, squeezey, woman, women
